# Supplementary material
Source: HighWire-hosted journal article supplement (https://bmjopenrespres.bmj.com/content/9/1/e001182)
Supplement: inline-supplementary-material-9 [file inline-supplementary-material-9.xlsx]

## Sheet: Sheet1
Table S10. Significant (false discovery rate (FDR) of 10%) SOMAscan proteomic associations to absolute and relative adjusted Perc15 density (emphysema) changes within subjects in the SE cluster at Visit 1 who remained in this cluster at Visit 2. Proteins were associated to emphysema changes between Visits 1 and 2 using Cox-proportional hazards. Covariates were age, sex, race and pack-years of smo…
		Protein	Beta coefficient (standard error)	FDR
Visit 1 SE cluster subjects who remained in the SE cluster at Visit 2	Absolute emphysema changes	TIMP-3	-2.03 (0.53)	0.0147644		Shared proteins
		PKC-G	-2.04 (0.52)	0.0147644		OAS1
		ON	-1.8 (0.56)	0.0226191		TLR4
		amyloid precursor protein	-1.87 (0.6)	0.0226191		SCF sR
		Nidogen	-4.8 (1.45)	0.0226191		TIMP-3
		Thrombospondin-1	-1.42 (0.45)	0.0226191		IGFBP-3
		NID2	-4.62 (1.37)	0.0226191		NKp44
		ENPP7	1.6 (0.51)	0.0226191		IL-10
		Prothrombin	6.15 (1.9)	0.0226191		NAP-2
		S100A12	-3.28 (0.97)	0.0226191		Angiopoietin-1
		Galectin-7	-3.19 (1.02)	0.0226191		BCAM
		Angiopoietin-1	-2.09 (0.71)	0.0345225		PAI-1
		PAI-1	-1.55 (0.53)	0.0348481		CD36 ANTIGEN
		Arylsulfatase A	-2.39 (0.84)	0.036462		IL-17 sR
		PDGF-AA	-1.5 (0.53)	0.036462		ON
		Antithrombin III	7.48 (2.68)	0.0367528		resistin
		annexin II	3.27 (1.17)	0.0367528		amyloid precursor protein
		Protease nexin I	-2.09 (0.76)	0.0373759		ASAHL
		TLR4	-2.24 (0.83)	0.037916		Nidogen
		GI24	-5.71 (2.19)	0.037916		Chk2
		IGFBP-3	-3.36 (1.26)	0.037916		Thrombospondin-1
		CD36 ANTIGEN	2.41 (0.92)	0.037916		DKK1
		resistin	-2.71 (1.04)	0.037916		dopa decarboxylase
		WISP-1	-2.15 (0.81)	0.037916		Arylsulfatase A
		TF	1.78 (0.66)	0.037916		NID2
		NRX1B	2.19 (0.81)	0.037916		TLR4:MD-2 complex
		MMP-1	-1.34 (0.52)	0.0383078		Cystatin S
		OAS1	1.43 (0.6)	0.0391686		discoidin domain receptor 1
		LRRK2	-2.33 (0.98)	0.0391686		PDGF-BB
		NKp44	-8.01 (3.26)	0.0391686		ENPP7
		Fibrinogen	0.9 (0.38)	0.0391686		PDGF-AA
		OX40 Ligand	-6.44 (2.56)	0.0391686		CTAP-III
		IL-17 sR	-2.43 (0.97)	0.0391686		MMP-I
		ASAHL	1.44 (0.6)	0.0391686		TF
		Chk2	1.06 (0.45)	0.0391686		annexin II
		GCP-2	-1.84 (0.72)	0.0391686		SPTA2
		DKK1	-1.55 (0.66)	0.0391686		Notch-1
		Cystatin S	1.67 (0.7)	0.0391686		NRX1B
		PDGF-BB	-1.15 (0.46)	0.0391686		COLEC12
		Transferrin	6.38 (2.52)	0.0391686		PKC-G
		Olfactomedin-4	0.83 (0.34)	0.0391686		S100A12
		ATP synthase beta chain	-2.14 (0.91)	0.0391686		Ferritin
		SPTA2	-2.28 (0.97)	0.0391686		Galectin-7
		Testican-1	-2.44 (1.03)	0.0391686
		Ferritin	-1.14 (0.46)	0.0391686
		Lectin, mannose binding 2	-1.82 (0.74)	0.0391686
		MMP-10	-1.68 (0.7)	0.0391686
		discoidin domain receptor 1	3.08 (1.32)	0.0393967
		LY86	-2.98 (1.29)	0.0404936
		CaMKK alpha	-2.58 (1.12)	0.0404936
		IMDH2	-3.08 (1.34)	0.0404936
		Galectin-2	-1.53 (0.67)	0.0409893
		PDGFRA	-2.03 (0.91)	0.042417
		SCF sR	2.84 (1.27)	0.042417
		NET4	-4.47 (2)	0.042417
		PCI	3.26 (1.46)	0.042417
		CTAP-III	-1.01 (0.45)	0.042417
		Notch-1	5.27 (2.36)	0.042417
		IL-10	2.18 (0.99)	0.0440935
		BDNF	-1.66 (0.78)	0.0453233
		PF-4	-0.72 (0.34)	0.0453233
		NAP-2	-0.95 (0.44)	0.0453233
		a1-Antichymotrypsin	5.59 (2.62)	0.0453233
		PGRP-S	-1.34 (0.61)	0.0453233
		CDK1/cyclin B	-5.57 (2.62)	0.0453233
		Angiostatin	2.49 (1.15)	0.0453233
		HPGD	-2.19 (1.02)	0.0453233
		KI3L2	-1.36 (0.64)	0.0453233
		p53	-2.82 (1.3)	0.0453233
		LIGHT	-1.86 (0.88)	0.0465196
		IL-20 Ra	-2.79 (1.33)	0.0468618
		dopa decarboxylase	4.73 (2.28)	0.0472257
		OBCAM	-2.54 (1.23)	0.0472257
		OLR1	-1.37 (0.66)	0.0472257
		TLR4:MD-2 complex	3.47 (1.67)	0.0472257
		annexin VI	-0.83 (0.4)	0.0477096
		COLEC12	2.62 (1.28)	0.0477096
		IL-12 Rb1	-3.96 (1.95)	0.0484937
		BCAM	3.54 (1.75)	0.0484937
		Semaphorin-3E	1.71 (0.84)	0.0484937
	Relative emphysema changes	TIMP-3	-2.79 (0.97)	0.0362656
		IGFBP-3	-6.63 (2.15)	0.0362656
		PAI-1	-2.69 (0.93)	0.0362656
		Nidogen	-7.45 (2.59)	0.0362656
		Chk2	2.34 (0.75)	0.0362656
		MDC	-5.48 (1.84)	0.0362656
		discoidin domain receptor 1	6.36 (2.24)	0.0362656
		ENPP7	2.65 (0.9)	0.0362656
		TF	3.43 (1.13)	0.0362656
		NRX1B	4.55 (1.37)	0.0362656
		Ficolin-3	-1.31 (0.45)	0.0362656
		S100A12	-5.35 (1.71)	0.0362656
		resistin	-4.98 (1.79)	0.0365122
		Notch-1	11.18 (4)	0.0365122
		OAS1	2.75 (1.03)	0.0370653
		TLR4	-3.7 (1.46)	0.0370653
		RNF43	4.35 (1.59)	0.0370653
		SCF sR	5.32 (2.2)	0.0370653
		Ephrin-B3	2.69 (1.11)	0.0370653
		Cadherin-5	6.85 (2.78)	0.0370653
		CD36 ANTIGEN	3.94 (1.62)	0.0370653
		IL-17 sR	-4.24 (1.7)	0.0370653
		PD-L2	5.83 (2.18)	0.0370653
		ON	-2.5 (1.02)	0.0370653
		amyloid precursor protein	-2.65 (1.08)	0.0370653
		Thrombospondin-1	-2.02 (0.81)	0.0370653
		NID2	-6.7 (2.48)	0.0370653
		Cystatin S	2.94 (1.22)	0.0370653
		TMA	5.09 (2.05)	0.0370653
		PDGF-AA	-2.26 (0.94)	0.0370653
		TGF-b R II	2.25 (0.91)	0.0370653
		PKC-G	-2.58 (0.97)	0.0370653
		Ferritin	-2.04 (0.79)	0.0370653
		PGM1	3.13 (1.28)	0.0370653
		Galectin-7	-4.45 (1.84)	0.0370653
		WFKN2	4.77 (2.01)	0.0383407
		NAP-2	-1.78 (0.76)	0.0406231
		HCC-1	-4.44 (1.95)	0.0406231
		DC-SIGN	3.61 (1.55)	0.0406231
		ASAHL	2.4 (1.05)	0.0406231
		dopa decarboxylase	8.97 (3.94)	0.0406231
		Arylsulfatase A	-3.47 (1.51)	0.0406231
		CTAP-III	-1.82 (0.79)	0.0406231
		RANTES	-2.32 (1.02)	0.0406231
		IL-27	8.32 (3.71)	0.0411183
		IL-15 Ra	2.98 (1.34)	0.0411183
		TLR4:MD-2 complex	6.42 (2.89)	0.0411183
		annexin II	4.73 (2.1)	0.0411183
		SPTA2	-3.79 (1.7)	0.0411183
		SNP25	3.65 (1.68)	0.0418391
		IL-10	3.73 (1.72)	0.0418391
		CFC1	2.25 (1.04)	0.0418391
		IL-17B	3.65 (1.66)	0.0418391
		PDGF-BB	-1.78 (0.82)	0.0418391
		COLEC12	4.82 (2.22)	0.0418391
		IL-34	5.63 (2.62)	0.0419869
		NCK1	1.98 (0.92)	0.0419869
		CLC1B	-2.49 (1.19)	0.0464057
		BTC	-2.94 (1.43)	0.047291
		NKp44	-11.92 (5.79)	0.047291
		BCAM	6.3 (3.04)	0.047291
		MMP-1	-1.9 (0.92)	0.047291
		Angiopoietin-1	-2.64 (1.3)	0.0487805
		DKK1	-2.35 (1.16)	0.0493383
