# Supplementary material
Source: HighWire-hosted journal article supplement (https://bmjopenrespres.bmj.com/content/9/1/e001182)
Supplement: inline-supplementary-material-10 [file inline-supplementary-material-10.xlsx]

## Sheet: Table S12
Table S12. SOMAscan plasma proteins associated to k-means clusters transitions between Visits 1 and 2. The proteomic characteristics of subjects who transitioned to the upper lobe predominant emphysema, airway predominant or severe emphysema (RRS to other subgroups) clusters at Visit 2 from the relatively resistant (RRS) cluster at Visit 1 were compared to subjects who were assigned to the RRS cl…
		Univariate model			Multivariate model
Protein name	Protein ID	Beta coefficient (standard error)	Unadjusted P-value	FDR	Beta coefficient (standard error)	Unadjusted P-value	FDR
41	P31946, P62258, P61981, Q04917, P27348, P63104, P31947	0.18 (0.075)	0.019	0.182316	0.14 (0.075)	0.056	0.504
14-3-3	P31946	0.16 (0.098)	0.096	0.33038	0.1 (0.095)	0.28	0.733735
14-3-3 protein beta/alpha	P27348	0.19 (0.097)	0.055	0.266822	0.13 (0.094)	0.17	0.641185
14-3-3 protein theta	P63104	0.094 (0.035)	0.0067	0.128581	0.088 (0.035)	0.014	0.416489
14-3-3 protein zeta/delta	P62258	0.18 (0.11 )	0.1	0.33038	0.12 (0.11 )	0.25	0.704644
14-3-3E	P14061	-0.064 (0.051)	0.21	0.501005	-0.07 (0.053)	0.19	0.6612
17-beta-HSD 1	P46952	0.052 (0.03 )	0.087	0.325315	0.037 (0.031)	0.23	0.69159
3HAO	P31937	0.027 (0.043)	0.53	0.779763	0.013 (0.044)	0.77	0.942636
3HIDH	P08865	0.017 (0.053)	0.76	0.909074	0.037 (0.055)	0.5	0.866534
40S ribosomal protein SA	P11171	-0.012 (0.05 )	0.82	0.932143	-0.016 (0.052)	0.75	0.939205
4-1BB	Q07011	0.003 (0.031)	0.92	0.964337	0.0027 (0.032)	0.93	0.974037
4-1BB ligand	P41273	-0.062 (0.037)	0.099	0.33038	-0.07 (0.038)	0.067	0.516102
4EBP2	Q13542	0.051 (0.043)	0.23	0.526579	0.025 (0.044)	0.57	0.880116
6Ckine	O00585	-0.02 (0.035)	0.56	0.797817	-0.042 (0.036)	0.24	0.699107
6-Phosphogluconate dehydrogenase	P52209	0.36 (0.11 )	0.0018	0.101138	0.24 (0.11 )	0.022	0.422206
a1-Antichymotrypsin	P01011	-0.03 (0.014)	0.037	0.227759	-0.037 (0.014)	0.012	0.416489
a1-Antitrypsin	P01009	0.086 (0.043)	0.045	0.24534	0.051 (0.043)	0.23	0.69159
a2-Antiplasmin	P08697	-0.033 (0.015)	0.031	0.205355	-0.026 (0.015)	0.075	0.529054
a2-HS-Glycoprotein	P02765	-0.03 (0.017)	0.075	0.299312	-0.022 (0.017)	0.18	0.6612
a2-Macroglobulin	P01023	-0.059 (0.039)	0.13	0.378683	-0.045 (0.039)	0.25	0.704644
ABL1	P00519	0.1 (0.046)	0.027	0.2025	0.1 (0.048)	0.034	0.457423
ABL2	P42684	0.059 (0.026)	0.025	0.198421	0.031 (0.026)	0.22	0.685203
ACE2	Q9BYF1	0.083 (0.036)	0.022	0.192685	0.058 (0.035)	0.1	0.552966
ACTH	P01189	0.06 (0.046)	0.2	0.48423	0.065 (0.048)	0.17	0.641185
Activated Protein C	P04070	0.052 (0.043)	0.22	0.511765	0.03 (0.043)	0.48	0.85457
Activin A	P08476	-0.062 (0.06 )	0.3	0.604709	-0.041 (0.061)	0.5	0.866534
Activin AB	P08476 P09529	-0.037 (0.053)	0.49	0.760345	-0.035 (0.055)	0.52	0.868886
Activin RIB	P36896	-0.027 (0.046)	0.56	0.797817	-0.033 (0.047)	0.49	0.865291
ADAM 9	Q13443	0.017 (0.043)	0.69	0.87	0.0065 (0.044)	0.88	0.967463
ADAM12	O43184	0.064 (0.037)	0.085	0.319669	0.042 (0.038)	0.27	0.726495
ADAMTS-4	O75173	0.03 (0.027)	0.27	0.57107	0.018 (0.028)	0.52	0.868886
ADAMTS-5	Q9UNA0	0.023 (0.042)	0.58	0.810385	0.026 (0.041)	0.53	0.868927
Adiponectin	Q15848	-0.032 (0.055)	0.56	0.797817	-0.0058 (0.054)	0.91	0.969429
Adrenomedullin	P35318	-0.0098 (0.022)	0.66	0.854464	-0.012 (0.022)	0.61	0.88647
Afamin	P43652	-0.033 (0.026)	0.2	0.48423	-0.021 (0.026)	0.43	0.831333
Aflatoxin B1 aldehyde reductase	O43488	0.28 (0.11 )	0.013	0.158551	0.19 (0.11 )	0.075	0.529054
AFP	P02771	0.032 (0.054)	0.55	0.793094	0.0072 (0.055)	0.9	0.967463
Aggrecan	P16112	0.02 (0.038)	0.61	0.831818	0.019 (0.039)	0.63	0.894614
AGR2	O95994	0.066 (0.029)	0.026	0.198421	0.068 (0.03 )	0.022	0.422206
AIF1	P55008	0.059 (0.03 )	0.047	0.24534	0.035 (0.029)	0.23	0.69159
AIP	O00170	0.15 (0.061)	0.015	0.163125	0.11 (0.06 )	0.062	0.516102
AK1A1	P14550	0.11 (0.05 )	0.026	0.198421	0.083 (0.05 )	0.094	0.552966
Albumin	P02768	-0.039 (0.024)	0.1	0.33038	-0.042 (0.021)	0.046	0.482953
ALCAM	Q13740	-0.017 (0.022)	0.44	0.723174	-0.0029 (0.021)	0.89	0.967463
aldolase A	P04075	0.069 (0.049)	0.16	0.427869	0.026 (0.045)	0.56	0.871037
ALK-1	P37023	0.01 (0.05 )	0.84	0.936123	-0.0088 (0.051)	0.86	0.963348
Alpha enolase	P06733	0.23 (0.092)	0.014	0.161681	0.16 (0.086)	0.066	0.516102
alpha-1-antichymotrypsin complex	P01011	0.1 (0.034)	0.0031	0.101138	0.063 (0.033)	0.056	0.504
ALT	P24298	0.019 (0.026)	0.48	0.751981	0.01 (0.026)	0.7	0.920867
AMGO2	Q86SJ2	-0.047 (0.036)	0.2	0.48423	-0.034 (0.037)	0.36	0.779104
Aminoacylase-1	Q03154	0.14 (0.068)	0.047	0.24534	0.13 (0.068)	0.063	0.516102
AMNLS	Q9BXJ7	0.0041 (0.043)	0.92	0.964337	0.027 (0.043)	0.54	0.868927
AMPK a1b1g1	Q13131 Q9Y478 P54619	-0.028 (0.048)	0.56	0.797817	-0.044 (0.049)	0.37	0.787684
AMPK a2b2g1	P54646 O43741 P54619	0.16 (0.073)	0.026	0.198421	0.1 (0.071)	0.15	0.619462
AMPM2	P50579	0.25 (0.08 )	0.0024	0.101138	0.17 (0.074)	0.023	0.422746
amyloid precursor protein	P05067	0.11 (0.077)	0.16	0.427869	0.057 (0.076)	0.46	0.844304
AN32B	Q92688	0.04 (0.021)	0.067	0.285735	0.03 (0.022)	0.17	0.641185
Angiogenin	P03950	0.03 (0.03 )	0.32	0.617751	0.0065 (0.029)	0.83	0.959559
Angiopoietin-1	Q15389	0.12 (0.058)	0.037	0.227759	0.077 (0.058)	0.19	0.6612
Angiopoietin-2	O15123	0.037 (0.03 )	0.21	0.501005	0.034 (0.03 )	0.26	0.714316
Angiopoietin-4	Q9Y264	0.065 (0.033)	0.046	0.24534	0.032 (0.033)	0.33	0.758187
Angiostatin	P00747	-0.017 (0.031)	0.59	0.818225	-0.013 (0.031)	0.66	0.905678
Angiotensinogen	P01019	0.0019 (0.035)	0.96	0.981049	0.021 (0.034)	0.54	0.868927
ANGL3	Q9Y5C1	0.047 (0.028)	0.096	0.33038	0.039 (0.029)	0.17	0.641185
ANGL4	Q9BY76	0.089 (0.039)	0.025	0.198421	0.057 (0.039)	0.14	0.615152
ANK2	Q01484	0.095 (0.064)	0.13	0.378683	0.08 (0.066)	0.22	0.685203
annexin I	P04083	0.078 (0.068)	0.25	0.548319	0.074 (0.07 )	0.29	0.737719
annexin II	P07355	-0.0066 (0.049)	0.89	0.958292	-0.017 (0.049)	0.73	0.939205
Annexin V	P08758	-0.13 (0.064)	0.037	0.227759	-0.13 (0.066)	0.042	0.482953
annexin VI	P08133	0.25 (0.11 )	0.026	0.198421	0.19 (0.11 )	0.081	0.542174
ANP	P01160	0.014 (0.045)	0.75	0.905412	0.0045 (0.045)	0.92	0.970574
Antithrombin III	P01008	-0.045 (0.016)	0.0056	0.1218	-0.046 (0.016)	0.0042	0.395455
Apo A-I	P02647	-0.023 (0.023)	0.32	0.617751	-0.042 (0.023)	0.07	0.516102
Apo B	P04114	-0.09 (0.056)	0.11	0.350122	-0.093 (0.056)	0.095	0.552966
Apo D	P05090	-0.00017 (0.034)	1	1	-0.0025 (0.034)	0.94	0.97745
Apo E	P02649	-0.0098 (0.054)	0.85	0.940042	0.013 (0.055)	0.82	0.959559
Apo E2	P02649	-0.016 (0.018)	0.38	0.671951	-0.016 (0.019)	0.39	0.807857
Apo E3	P02649	-0.016 (0.032)	0.61	0.831818	-0.0033 (0.033)	0.92	0.970574
Apo E4	P02649	-0.022 (0.026)	0.4	0.679688	-0.016 (0.027)	0.54	0.868927
Apo L1	O14791	0.034 (0.03 )	0.26	0.560826	0.015 (0.028)	0.6	0.880765
ApoM	O95445	-0.11 (0.048)	0.019	0.182316	-0.13 (0.048)	0.0055	0.395455
Apoptosis regulator Bcl-W	Q92843	0.051 (0.041)	0.21	0.501005	0.055 (0.042)	0.19	0.6612
AREG	P15514	0.21 (0.069)	0.0023	0.101138	0.16 (0.065)	0.015	0.416489
ARGI1	P05089	0.027 (0.07 )	0.7	0.875839	0.02 (0.072)	0.78	0.943373
ARI3A	Q99856	0.048 (0.045)	0.28	0.580922	0.019 (0.045)	0.67	0.909834
ARMEL	Q49AH0	-0.06 (0.035)	0.088	0.32625	-0.067 (0.034)	0.052	0.491739
ARP19	P56211	0.18 (0.079)	0.024	0.198228	0.13 (0.077)	0.083	0.542174
ARSB	P15848	0.13 (0.055)	0.021	0.191643	0.12 (0.057)	0.033	0.457423
ART	O00253	-0.029 (0.05 )	0.56	0.797817	-0.026 (0.052)	0.61	0.88647
Artemin	Q5T4W7	0.045 (0.062)	0.47	0.744357	0.053 (0.064)	0.41	0.824422
ARTS1	Q9NZ08	-0.067 (0.065)	0.3	0.604709	-0.088 (0.064)	0.17	0.641185
Arylsulfatase A	P15289	0.054 (0.043)	0.21	0.501005	0.018 (0.043)	0.68	0.912025
ASAH2	Q9NR71	-0.015 (0.054)	0.78	0.9164	-0.023 (0.055)	0.67	0.909834
ASAHL	Q02083	0.034 (0.068)	0.62	0.835847	0.0029 (0.069)	0.97	0.985097
ASGR1	P07306	0.008 (0.05 )	0.87	0.947705	0.035 (0.05 )	0.48	0.85457
ASM3A	Q92484	0.14 (0.052)	0.0058	0.122081	0.11 (0.052)	0.037	0.48285
a-Synuclein	P37840	0.14 (0.06 )	0.02	0.186429	0.11 (0.059)	0.071	0.520534
ATP synthase beta chain	P06576	0.084 (0.045)	0.063	0.279643	0.059 (0.045)	0.18	0.6612
ATPO	P48047	0.088 (0.097)	0.36	0.653408	0.027 (0.094)	0.77	0.942636
ATS1	Q9UHI8	0.066 (0.033)	0.048	0.249562	0.037 (0.033)	0.26	0.714316
ATS13	Q76LX8	-0.05 (0.031)	0.11	0.350122	-0.034 (0.032)	0.29	0.737719
ATS15	Q8TE58	-0.01 (0.039)	0.79	0.9164	-0.016 (0.04 )	0.7	0.920867
AURKB	Q96GD4	0.016 (0.023)	0.5	0.763158	0.0093 (0.023)	0.69	0.916955
Aurora kinase A	O14965	-0.03 (0.065)	0.64	0.847059	-0.012 (0.066)	0.85	0.959559
Azurocidin	P20160	0.12 (0.045)	0.0079	0.128965	0.087 (0.044)	0.047	0.482953
b2-Microglobulin	P61769	0.046 (0.033)	0.17	0.444589	0.055 (0.032)	0.084	0.542174
B7	P33681	-0.017 (0.035)	0.62	0.835847	-0.012 (0.036)	0.74	0.939205
B7-2	P42081	0.0016 (0.055)	0.98	0.988331	0.011 (0.056)	0.85	0.959559
B7-H1	Q9NZQ7	0.02 (0.078)	0.8	0.922261	0.023 (0.08 )	0.77	0.942636
B7-H2	O75144	0.071 (0.045)	0.12	0.365888	0.055 (0.044)	0.22	0.685203
BAD	Q92934	0.15 (0.074)	0.036	0.226957	0.091 (0.07 )	0.2	0.674419
BAFF	Q9Y275	-0.028 (0.043)	0.52	0.773774	-0.029 (0.043)	0.51	0.867731
BAFF Receptor	Q96RJ3	0.025 (0.041)	0.54	0.786496	0.036 (0.041)	0.39	0.807857
BARK1	P25098	0.2 (0.098)	0.044	0.242278	0.13 (0.093)	0.17	0.641185
BASI	P35613	0.069 (0.03 )	0.022	0.192685	0.062 (0.031)	0.047	0.482953
BCAM	P50895	-0.0065 (0.032)	0.84	0.936123	0.0084 (0.033)	0.8	0.949955
BCAR3	O75815	0.094 (0.032)	0.004	0.111064	0.069 (0.032)	0.031	0.454551
Bcl-2	P10415	0.091 (0.04 )	0.023	0.193645	0.049 (0.038)	0.2	0.674419
BCL2-like 1 protein	Q07817	0.029 (0.03 )	0.34	0.6375	0.01 (0.03 )	0.74	0.939205
BCL6	P41182	-0.0096 (0.054)	0.86	0.944697	-0.011 (0.055)	0.84	0.959559
BCMA	Q02223	0.015 (0.032)	0.65	0.84825	-0.0013 (0.032)	0.97	0.985097
BDNF	P23560	0.12 (0.056)	0.033	0.213193	0.076 (0.055)	0.17	0.641185
b-ECGF	P05230	-0.011 (0.031)	0.72	0.888091	-0.0011 (0.032)	0.97	0.985097
b-Endorphin	P01189	-0.091 (0.044)	0.038	0.229583	-0.076 (0.045)	0.089	0.547854
bFGF	P09038	-0.13 (0.095)	0.18	0.452601	-0.13 (0.098)	0.19	0.6612
bFGF-R	P11362	0.016 (0.023)	0.51	0.765	0.03 (0.024)	0.2	0.674419
BFL1	Q16548	0.024 (0.025)	0.35	0.645127	0.0079 (0.025)	0.76	0.939205
BGH3	Q15582	-0.027 (0.029)	0.35	0.645127	-0.043 (0.029)	0.14	0.615152
BGN	P21810	-0.076 (0.057)	0.19	0.471388	-0.053 (0.058)	0.36	0.779104
BID	P55957	0.046 (0.064)	0.48	0.751981	0.048 (0.065)	0.46	0.844304
BLC	O43927	0.063 (0.057)	0.27	0.57107	0.032 (0.058)	0.58	0.880116
BMP RII	Q13873	0.073 (0.051)	0.15	0.407813	0.067 (0.052)	0.2	0.674419
BMP-1	P13497	-0.017 (0.038)	0.65	0.84825	-0.037 (0.038)	0.33	0.758187
BMP10	O95393	-0.0082 (0.037)	0.82	0.932143	-0.011 (0.038)	0.78	0.943373
BMP-14	P43026	5e-04 (0.027)	0.99	0.993808	-0.009 (0.028)	0.75	0.939205
BMP-6	P22004	-0.001 (0.038)	0.98	0.988331	-0.0055 (0.037)	0.88	0.967463
BMP-7	P18075	-0.025 (0.037)	0.51	0.765	-0.03 (0.038)	0.43	0.831333
BMPER	Q8N8U9	0.0069 (0.041)	0.87	0.947705	-0.0079 (0.042)	0.85	0.959559
BMPR1A	P36894	-0.028 (0.036)	0.45	0.73041	-2.4e-05 (0.037)	1	1
BMX	P51813	0.0066 (0.035)	0.85	0.940042	-0.018 (0.035)	0.6	0.880765
b-NGF	P01138	0.13 (0.066)	0.043	0.238787	0.15 (0.068)	0.033	0.457423
BNP-32	P16860	0.082 (0.038)	0.033	0.213193	0.093 (0.039)	0.018	0.419464
BOC	Q9BWV1	-0.0073 (0.046)	0.87	0.947705	-0.013 (0.048)	0.78	0.943373
Bone proteoglycan II	P07585	-0.025 (0.028)	0.37	0.661438	-0.032 (0.029)	0.26	0.714316
BPI	P17213	0.3 (0.082)	0.00038	0.058725	0.24 (0.083)	0.0032	0.395455
BRF-1	Q92994	0.1 (0.039)	0.0081	0.128965	0.096 (0.039)	0.015	0.416489
BSP	P21815	0.043 (0.053)	0.42	0.701793	0.012 (0.054)	0.83	0.959559
BSSP4	Q9GZN4	-0.0025 (0.032)	0.94	0.976672	-0.025 (0.032)	0.43	0.831333
BST1	Q10588	-0.019 (0.065)	0.77	0.9135	-0.0079 (0.067)	0.91	0.969429
BTC	P35070	0.1 (0.047)	0.03	0.205355	0.11 (0.048)	0.028	0.44561
BTK	Q06187	0.34 (0.16 )	0.033	0.213193	0.23 (0.15 )	0.13	0.591115
C1-Esterase Inhibitor	P05155	-0.0091 (0.033)	0.78	0.9164	-0.018 (0.033)	0.59	0.880765
C1q	P02745 P02746 P02747	-0.051 (0.041)	0.22	0.511765	-0.05 (0.042)	0.23	0.69159
C1QBP	Q07021	-0.0064 (0.016)	0.68	0.868297	-0.009 (0.016)	0.56	0.871037
C1QR1	Q9NPY3	0.021 (0.027)	0.45	0.73041	0.018 (0.028)	0.51	0.867731
C1r	P00736	0.012 (0.068)	0.86	0.944697	0.03 (0.069)	0.66	0.905678
C2	P06681	0.011 (0.02 )	0.57	0.804162	0.0054 (0.02 )	0.79	0.947564
C3	P01024	-0.054 (0.052)	0.3	0.604709	-0.028 (0.053)	0.59	0.880765
C34 gp41 HIV Fragment	Q70626	0.037 (0.045)	0.42	0.701793	0.021 (0.046)	0.65	0.903355
C3a	P01024	-0.074 (0.072)	0.3	0.604709	-0.03 (0.073)	0.68	0.912025
C3adesArg	P01024	-0.056 (0.03 )	0.064	0.280268	-0.047 (0.031)	0.13	0.591115
C3b	P01024	-0.3 (0.1 )	0.0031	0.101138	-0.22 (0.1 )	0.03	0.454551
C3d	P01024	-0.00047 (0.041)	0.99	0.993808	0.032 (0.04 )	0.43	0.831333
C4	P0C0L4, P0C0L5	-0.048 (0.032)	0.13	0.378683	-0.047 (0.032)	0.15	0.619462
C4b	P0C0L4 P0C0L5	-0.066 (0.086)	0.44	0.723174	-0.033 (0.089)	0.71	0.925624
C5	P01031	0.012 (0.018)	0.52	0.773774	0.009 (0.019)	0.63	0.894614
C5a	P01031	-0.012 (0.039)	0.75	0.905412	-0.013 (0.04 )	0.75	0.939205
C5b, 6 Complex	P01031,P13671	-0.018 (0.021)	0.4	0.679688	-0.019 (0.021)	0.37	0.787684
C6	P13671	-0.065 (0.03 )	0.029	0.205355	-0.057 (0.029)	0.049	0.48694
C7	P10643	0.079 (0.031)	0.011	0.149531	0.06 (0.031)	0.057	0.50602
C8	P07357,P07358,P07360	0.0094 (0.036)	0.79	0.9164	0.0072 (0.036)	0.84	0.959559
C9	P02748	0.042 (0.034)	0.22	0.511765	0.029 (0.035)	0.4	0.815625
CAD15	P55291	0.072 (0.023)	0.0017	0.101138	0.046 (0.022)	0.041	0.482953
Cadherin E	P12830	-0.029 (0.022)	0.18	0.452601	-0.022 (0.022)	0.34	0.767647
Cadherin-12	P55289	0.082 (0.036)	0.023	0.193645	0.056 (0.036)	0.12	0.573626
Cadherin-2	P19022	-0.073 (0.048)	0.13	0.378683	-0.083 (0.05 )	0.094	0.552966
Cadherin-5	P33151	0.0091 (0.025)	0.72	0.888091	0.02 (0.026)	0.44	0.833382
Cadherin-6	P55285	0.035 (0.03 )	0.24	0.540933	0.041 (0.03 )	0.18	0.6612
Calcineurin	Q08209 P63098	0.12 (0.081)	0.15	0.407813	0.074 (0.079)	0.35	0.774153
Calcineurin B a	P63098	0.0091 (0.034)	0.79	0.9164	0.0048 (0.035)	0.89	0.967463
calgranulin B	P06702	0.18 (0.057)	0.0015	0.101138	0.16 (0.059)	0.0067	0.395455
Calpain I	P07384 P04632	0.15 (0.071)	0.036	0.226957	0.11 (0.068)	0.11	0.567391
Calpastatin	P20810	-0.085 (0.049)	0.083	0.317639	-0.072 (0.049)	0.14	0.615152
calreticulin	P27797	0.052 (0.039)	0.18	0.452601	0.043 (0.04 )	0.28	0.733735
CAMK1	Q14012	0.03 (0.045)	0.51	0.765	-3.6e-06 (0.045)	1	1
CAMK1D	Q8IU85	0.092 (0.033)	0.0063	0.124657	0.082 (0.034)	0.015	0.416489
CAMK2A	Q9UQM7	0.063 (0.046)	0.18	0.452601	0.04 (0.045)	0.38	0.799839
CAMK2B	Q13554	0.13 (0.06 )	0.037	0.227759	0.079 (0.057)	0.17	0.641185
CAMK2D	Q13557	0.15 (0.072)	0.041	0.231623	0.097 (0.069)	0.16	0.63465
CaMKK alpha	Q8N5S9	0.16 (0.046)	0.0005	0.0593182	0.13 (0.045)	0.003	0.395455
CAPG	P40121	0.0017 (0.046)	0.97	0.985864	0.0021 (0.045)	0.96	0.982588
Carbonic anhydrase 6	P23280	-0.17 (0.073)	0.024	0.198228	-0.18 (0.071)	0.011	0.416489
Carbonic anhydrase 9	Q16790	0.05 (0.05 )	0.31	0.604709	0.038 (0.051)	0.46	0.844304
Carbonic anhydrase I	P00915	0.071 (0.057)	0.22	0.511765	0.036 (0.056)	0.53	0.868927
carbonic anhydrase II	P00918	0.076 (0.052)	0.14	0.39375	0.075 (0.053)	0.16	0.63465
Carbonic anhydrase III	P07451	0.1 (0.057)	0.079	0.310527	0.06 (0.054)	0.27	0.726495
Carbonic Anhydrase IV	P22748	-0.013 (0.032)	0.69	0.87	-0.01 (0.033)	0.75	0.939205
Carbonic anhydrase VII	P43166	0.048 (0.039)	0.22	0.511765	0.045 (0.04 )	0.26	0.714316
Carbonic Anhydrase X	Q9NS85	0.03 (0.027)	0.26	0.560826	0.036 (0.027)	0.19	0.6612
Carbonic anhydrase XIII	Q8N1Q1	0.037 (0.11 )	0.73	0.89619	0.017 (0.11 )	0.88	0.967463
Cardiotrophin-1	Q16619	-0.0081 (0.025)	0.75	0.905412	-0.012 (0.026)	0.64	0.900971
Caspase-10	Q92851	0.072 (0.049)	0.14	0.39375	0.069 (0.049)	0.16	0.63465
Caspase-2	P42575	0.1 (0.058)	0.073	0.297703	0.099 (0.059)	0.094	0.552966
Caspase-3	P42574	0.06 (0.1 )	0.57	0.804162	0.021 (0.1 )	0.84	0.959559
Catalase	P04040	0.087 (0.05 )	0.081	0.315537	0.068 (0.048)	0.16	0.63465
CATC	P53634	-0.06 (0.036)	0.096	0.33038	-0.088 (0.037)	0.017	0.419464
CATE	P14091	0.029 (0.052)	0.58	0.810385	0.0013 (0.053)	0.98	0.989095
CATF	Q9UBX1	-0.0055 (0.032)	0.86	0.944697	-0.0045 (0.032)	0.89	0.967463
Cathepsin A	P10619	0.097 (0.051)	0.056	0.269668	0.037 (0.05 )	0.46	0.844304
Cathepsin B	P07858	-0.044 (0.032)	0.17	0.444589	-0.047 (0.033)	0.15	0.619462
Cathepsin D	P07339	0.15 (0.068)	0.034	0.2175	0.13 (0.07 )	0.064	0.516102
Cathepsin G	P08311	0.22 (0.057)	0.00016	0.04176	0.19 (0.057)	0.0012	0.348
Cathepsin H	P09668	0.046 (0.068)	0.5	0.763158	0.023 (0.069)	0.74	0.939205
Cathepsin S	P25774	-0.031 (0.026)	0.25	0.548319	-0.033 (0.027)	0.22	0.685203
Cathepsin V	O60911	0.011 (0.043)	0.79	0.9164	-0.015 (0.042)	0.72	0.930297
CATZ	Q9UBR2	-0.018 (0.034)	0.61	0.831818	-0.0094 (0.034)	0.78	0.943373
CBG	P08185	0.087 (0.061)	0.15	0.407813	0.077 (0.062)	0.21	0.675
CBPE	P16870	-0.0066 (0.036)	0.86	0.944697	0.00066 (0.037)	0.99	0.994573
CBX5	P45973	0.0091 (0.038)	0.81	0.926424	0.014 (0.039)	0.72	0.930297
CCL28	Q9NRJ3	0.16 (0.055)	0.0047	0.1125	0.11 (0.055)	0.041	0.482953
CD109	Q6YHK3	-0.03 (0.052)	0.56	0.797817	-0.0094 (0.053)	0.86	0.963348
CD177	Q8N6Q3	0.067 (0.079)	0.4	0.679688	0.022 (0.081)	0.78	0.943373
CD22	P20273	0.029 (0.027)	0.28	0.580922	0.015 (0.027)	0.58	0.880116
CD226	Q15762	0.041 (0.036)	0.26	0.560826	0.012 (0.037)	0.74	0.939205
CD23	P06734	-0.055 (0.048)	0.25	0.548319	-0.023 (0.049)	0.63	0.894614
CD244	Q9BZW8	-0.012 (0.041)	0.77	0.9135	0.0022 (0.041)	0.96	0.982588
CD27	P26842	-0.04 (0.022)	0.073	0.297703	-0.032 (0.023)	0.16	0.63465
CD30	P28908	0.033 (0.029)	0.25	0.548319	0.038 (0.03 )	0.2	0.674419
CD30 Ligand	P32971	-0.012 (0.033)	0.72	0.888091	0.0068 (0.034)	0.84	0.959559
CD36 ANTIGEN	P16671	0.017 (0.048)	0.73	0.89619	0.08 (0.046)	0.081	0.542174
CD38	P28907	0.082 (0.038)	0.031	0.205355	0.098 (0.039)	0.012	0.416489
CD39	P49961	-0.0023 (0.029)	0.94	0.976672	-0.0027 (0.03 )	0.93	0.974037
CD40 ligand, soluble	P29965	0.15 (0.054)	0.0078	0.128965	0.13 (0.054)	0.02	0.420968
CD47	Q08722	0.087 (0.057)	0.13	0.378683	0.038 (0.058)	0.5	0.866534
CD48	P09326	0.052 (0.026)	0.049	0.252747	0.063 (0.027)	0.02	0.420968
CD59	P13987	0.023 (0.025)	0.36	0.653408	0.035 (0.025)	0.16	0.63465
CD5L	O43866	-0.0081 (0.062)	0.9	0.961129	-0.0082 (0.064)	0.9	0.967463
CD63	P08962	0.1 (0.044)	0.021	0.191643	0.094 (0.045)	0.038	0.482953
CD70	P32970	-0.0094 (0.041)	0.82	0.932143	0.0078 (0.042)	0.85	0.959559
CD83	Q01151	-0.046 (0.064)	0.47	0.744357	-0.059 (0.066)	0.37	0.787684
CD97	P48960	0.033 (0.027)	0.22	0.511765	0.033 (0.028)	0.24	0.699107
CDC37	Q16543	0.043 (0.038)	0.26	0.560826	0.028 (0.037)	0.46	0.844304
CDK1/cyclin B	P06493 P14635	0.059 (0.026)	0.026	0.198421	0.036 (0.025)	0.16	0.63465
CDK2/cyclin A	P24941 P20248	-0.025 (0.033)	0.46	0.737469	-0.031 (0.034)	0.36	0.779104
CDK5/p35	Q00535 Q15078	0.023 (0.038)	0.55	0.793094	0.021 (0.04 )	0.6	0.880765
CDK8/cyclin C	P49336 P24863	0.087 (0.037)	0.02	0.186429	0.058 (0.036)	0.11	0.567391
CDON	Q4KMG0	0.0033 (0.028)	0.9	0.961129	0.0035 (0.028)	0.9	0.967463
CEBPB	P17676	-0.026 (0.036)	0.47	0.744357	-0.043 (0.036)	0.24	0.699107
CFC1	P0CG37	-0.0064 (0.061)	0.92	0.964337	-0.0032 (0.063)	0.96	0.982588
CgA	P10645	0.042 (0.077)	0.59	0.818225	0.048 (0.076)	0.53	0.868927
cGMP-stimulated PDE	O00408	0.089 (0.03 )	0.0031	0.101138	0.073 (0.029)	0.014	0.416489
CHIP	Q9UNE7	0.095 (0.078)	0.22	0.511765	0.073 (0.079)	0.35	0.774153
Chitotriosidase-1	Q13231	-0.059 (0.062)	0.34	0.6375	-0.089 (0.062)	0.15	0.619462
CHK1	O14757	0.032 (0.026)	0.22	0.511765	0.025 (0.026)	0.35	0.774153
Chk2	O96017	-0.16 (0.1 )	0.12	0.365888	-0.16 (0.11 )	0.12	0.573626
CHKB	Q9Y259	0.045 (0.057)	0.43	0.713024	0.023 (0.058)	0.69	0.916955
CHL1	O00533	0.012 (0.027)	0.66	0.854464	0.0057 (0.028)	0.84	0.959559
CHST2	Q9Y4C5	-0.038 (0.052)	0.47	0.744357	-0.052 (0.054)	0.34	0.767647
CHST6	Q9GZX3	0.023 (0.034)	0.5	0.763158	0.021 (0.035)	0.54	0.868927
Chymase	P23946	0.055 (0.029)	0.056	0.269668	0.04 (0.029)	0.16	0.63465
cIAP-2	Q13489	0.0058 (0.046)	0.9	0.961129	-0.0066 (0.047)	0.89	0.967463
c-Jun	P05412	0.052 (0.035)	0.13	0.378683	0.034 (0.035)	0.33	0.758187
CK2-A1:B	P68400 P67870	0.22 (0.078)	0.0049	0.1125	0.16 (0.075)	0.034	0.457423
CK2-A2:B	P19784 P67870	-0.059 (0.062)	0.35	0.645127	-0.083 (0.063)	0.19	0.6612
CKAP2	Q8WWK9	-0.016 (0.039)	0.69	0.87	-0.039 (0.039)	0.32	0.758187
Ck-b-8-1	P55773	-0.044 (0.043)	0.31	0.604709	-0.021 (0.04 )	0.59	0.880765
CK-BB	P12277	0.03 (0.054)	0.58	0.810385	0.014 (0.056)	0.81	0.954878
CK-MB	P12277 P06732	0.019 (0.089)	0.83	0.93375	-0.075 (0.083)	0.37	0.787684
CK-MM	P06732	0.00058 (0.063)	0.99	0.993808	-0.07 (0.058)	0.23	0.69159
CLC1B	Q9P126	0.11 (0.074)	0.14	0.39375	0.061 (0.071)	0.39	0.807857
CLC4K	Q9UJ71	0.0017 (0.032)	0.96	0.981049	-0.0088 (0.033)	0.79	0.947564
CLC7A	Q9BXN2	0.095 (0.034)	0.0056	0.1218	0.063 (0.034)	0.065	0.516102
CLF-1/CLC Complex	O75462 Q9UBD9	-0.011 (0.046)	0.81	0.926424	0.006 (0.047)	0.9	0.967463
CLM6	Q08708	0.0095 (0.031)	0.76	0.909074	0.033 (0.031)	0.28	0.733735
Clusterin	P10909	-0.0083 (0.025)	0.74	0.899162	-0.02 (0.024)	0.42	0.829198
c-Myc	P01106	0.014 (0.065)	0.83	0.93375	0.029 (0.066)	0.66	0.905678
CNDP1	Q96KN2	-0.084 (0.052)	0.1	0.33038	-0.048 (0.052)	0.36	0.779104
CNTF	P26441	-0.029 (0.026)	0.27	0.57107	-0.022 (0.026)	0.41	0.824422
CNTFR alpha	P26992	-0.046 (0.038)	0.23	0.526579	-0.02 (0.038)	0.6	0.880765
CNTN2	Q02246	0.084 (0.045)	0.063	0.279643	0.1 (0.046)	0.031	0.454551
CO8A1	P27658	-0.0098 (0.081)	0.9	0.961129	-0.022 (0.084)	0.79	0.947564
Coactosin-like protein	Q14019	-0.0071 (0.038)	0.85	0.940042	-0.0046 (0.038)	0.9	0.967463
Coagulation Factor IX	P00740	0.0031 (0.023)	0.89	0.958292	0.0069 (0.024)	0.77	0.942636
Coagulation Factor IXab	P00740	0.0049 (0.023)	0.84	0.936123	0.011 (0.024)	0.65	0.903355
Coagulation Factor V	P12259	-0.0032 (0.035)	0.93	0.972476	-0.021 (0.035)	0.56	0.871037
Coagulation Factor VII	P08709	0.022 (0.034)	0.51	0.765	0.036 (0.034)	0.3	0.740076
Coagulation Factor X	P00742	-0.013 (0.024)	0.6	0.829449	-0.00015 (0.024)	0.99	0.994573
Coagulation Factor Xa	P00742	0.004 (0.026)	0.88	0.955408	0.012 (0.026)	0.63	0.894614
Coagulation Factor XI	P03951	-0.025 (0.025)	0.3	0.604709	-0.011 (0.025)	0.67	0.909834
Cofilin-1	P23528	0.097 (0.067)	0.15	0.407813	0.053 (0.065)	0.42	0.829198
COLEC12	Q5KU26	-0.021 (0.038)	0.57	0.804162	0.011 (0.037)	0.76	0.939205
Collectin Kidney 1	Q9BWP8	0.12 (0.052)	0.022	0.192685	0.1 (0.053)	0.047	0.482953
COMMD7	Q86VX2	0.062 (0.037)	0.097	0.33038	0.038 (0.036)	0.3	0.740076
complement factor H-related 5	Q9BXR6	0.053 (0.034)	0.12	0.365888	0.035 (0.034)	0.31	0.750557
CONA1	Q86Y22	0.054 (0.043)	0.21	0.501005	0.027 (0.042)	0.52	0.868886
contactin-1	Q12860	-0.014 (0.027)	0.62	0.835847	0.0063 (0.028)	0.82	0.959559
Contactin-4	Q8IWV2	-0.034 (0.026)	0.2	0.48423	-0.016 (0.026)	0.54	0.868927
Contactin-5	O94779	-0.028 (0.026)	0.29	0.595984	-0.015 (0.027)	0.58	0.880116
Corticotropin-lipotropin	P01189	-0.045 (0.048)	0.35	0.645127	-0.052 (0.049)	0.29	0.737719
COX-2	P35354	0.094 (0.038)	0.015	0.163125	0.084 (0.039)	0.034	0.457423
CPNE1	Q99829	0.26 (0.099)	0.0097	0.140323	0.18 (0.095)	0.055	0.501923
CRDL1	Q9BU40	-0.026 (0.028)	0.36	0.653408	-0.015 (0.026)	0.58	0.880116
CREL1	Q96HD1	-0.058 (0.042)	0.17	0.444589	-0.0034 (0.035)	0.92	0.970574
Cripto	P13385	-0.022 (0.11 )	0.84	0.936123	0.043 (0.11 )	0.7	0.920867
CRIS3	P54108	-0.035 (0.042)	0.41	0.690387	-0.045 (0.043)	0.29	0.737719
CRK	P46108	0.046 (0.067)	0.5	0.763158	0.032 (0.067)	0.63	0.894614
CRP	P02741	0.027 (0.1 )	0.79	0.9164	0.021 (0.11 )	0.84	0.959559
CRTAM	O95727	0.055 (0.058)	0.35	0.645127	0.038 (0.059)	0.52	0.868886
CSF-1	P09603	0.089 (0.023)	0.00016	0.04176	0.069 (0.023)	0.0033	0.395455
CSH	P0DML2 P0DML3	0.081 (0.06 )	0.18	0.452601	0.041 (0.059)	0.49	0.865291
CSK	P41240	0.31 (0.16 )	0.045	0.24534	0.21 (0.15 )	0.15	0.619462
CSK21	P68400	0.094 (0.038)	0.013	0.158551	0.085 (0.038)	0.027	0.440437
CSRP3	P50461	0.036 (0.049)	0.46	0.737469	0.033 (0.05 )	0.51	0.867731
CTACK	Q9Y4X3	0.033 (0.037)	0.38	0.671951	0.038 (0.038)	0.32	0.758187
CTAP-III	P02775	0.18 (0.12 )	0.12	0.365888	0.11 (0.12 )	0.33	0.758187
CTGF	P29279	-0.0061 (0.053)	0.91	0.96392	-0.031 (0.054)	0.57	0.880116
CTLA-4	P16410	0.042 (0.065)	0.51	0.765	0.079 (0.066)	0.23	0.69159
CXCL16, soluble	Q9H2A7	-0.012 (0.028)	0.67	0.860581	-0.024 (0.029)	0.4	0.815625
Cyclin B1	P14635	-0.013 (0.052)	0.8	0.922261	-0.022 (0.053)	0.68	0.912025
Cyclophilin A	P62937	0.11 (0.06 )	0.061	0.279	0.074 (0.058)	0.21	0.675
Cyclophilin F	P30405	0.14 (0.15 )	0.35	0.645127	0.071 (0.14 )	0.62	0.894033
Cystatin C	P01034	0.026 (0.025)	0.29	0.595984	0.029 (0.023)	0.21	0.675
Cystatin M	Q15828	-0.091 (0.041)	0.026	0.198421	-0.088 (0.038)	0.02	0.420968
Cystatin-S	P01036	-0.0065 (0.051)	0.9	0.961129	0.0077 (0.053)	0.88	0.967463
CYTD	P28325	-0.045 (0.065)	0.49	0.760345	-0.065 (0.064)	0.31	0.750557
CYTF	O76096	0.089 (0.069)	0.2	0.48423	0.045 (0.069)	0.52	0.868886
Cytidylate kinase	P30085	0.026 (0.026)	0.31	0.604709	0.012 (0.025)	0.63	0.894614
CYTN	P01037	-0.092 (0.058)	0.12	0.365888	-0.056 (0.058)	0.33	0.758187
Cytochrome c	P99999	0.064 (0.067)	0.34	0.6375	0.056 (0.068)	0.41	0.824422
Cytochrome P450 3A4	P08684	0.023 (0.049)	0.64	0.847059	0.00094 (0.048)	0.98	0.989095
CYTT	P09228	-0.038 (0.056)	0.5	0.763158	-0.006 (0.056)	0.91	0.969429
DAF	P08174	-0.04 (0.026)	0.12	0.365888	-0.028 (0.026)	0.29	0.737719
DAN	P41271	0.08 (0.057)	0.17	0.444589	0.069 (0.058)	0.23	0.69159
DAPK2	Q9UIK4	0.1 (0.042)	0.015	0.163125	0.098 (0.043)	0.022	0.422206
DBNL	Q9UJU6	0.012 (0.047)	0.8	0.922261	-0.0095 (0.046)	0.84	0.959559
DcR3	O95407	0.042 (0.041)	0.3	0.604709	0.033 (0.042)	0.43	0.831333
DC-SIGN	Q9NNX6	-0.012 (0.046)	0.8	0.922261	0.0021 (0.047)	0.96	0.982588
DC-SIGNR	Q9H2X3	-0.0069 (0.017)	0.69	0.87	-0.011 (0.018)	0.54	0.868927
D-dimer	P02671 P02675 P02679	0.028 (0.07 )	0.69	0.87	0.037 (0.072)	0.61	0.88647
DEAD-box protein 19B	Q9UMR2	0.067 (0.066)	0.31	0.604709	0.039 (0.064)	0.54	0.868927
DERM	Q07507	-0.09 (0.03 )	0.0026	0.101138	-0.059 (0.027)	0.028	0.44561
Desmoglein-1	Q02413	-0.003 (0.037)	0.94	0.976672	-0.0085 (0.038)	0.82	0.959559
DHH	O43323	0.16 (0.054)	0.0039	0.111064	0.11 (0.052)	0.042	0.482953
discoidin domain receptor 1	Q08345	0.0049 (0.039)	0.9	0.961129	0.0067 (0.04 )	0.87	0.965434
Discoidin domain receptor 2	Q16832	0.062 (0.026)	0.018	0.177955	0.042 (0.026)	0.11	0.567391
DKK1	O94907	0.067 (0.066)	0.31	0.604709	0.03 (0.066)	0.65	0.903355
DKK3	Q9UBP4	-0.03 (0.028)	0.29	0.595984	-0.023 (0.027)	0.39	0.807857
Dkk-4	Q9UBT3	0.082 (0.047)	0.085	0.319669	0.076 (0.047)	0.11	0.567391
DLC8	P63167	0.13 (0.071)	0.059	0.27796	0.16 (0.072)	0.03	0.454551
DLL1	O00548	0.00012 (0.029)	1	1	0.0044 (0.03 )	0.88	0.967463
DLL4	Q9NR61	0.026 (0.031)	0.4	0.679688	0.022 (0.032)	0.5	0.866534
DLRB1	Q9NP97	0.12 (0.091)	0.19	0.471388	0.083 (0.087)	0.34	0.767647
DnaJ homolog	Q96DA6	0.017 (0.028)	0.54	0.786496	0.00024 (0.028)	0.99	0.994573
dopa decarboxylase	P20711	-0.047 (0.038)	0.22	0.511765	-0.034 (0.039)	0.38	0.799839
DPP2	Q9UHL4	0.025 (0.042)	0.56	0.797817	0.015 (0.043)	0.73	0.939205
DR6	O75509	-0.036 (0.025)	0.15	0.407813	-0.019 (0.024)	0.45	0.844304
DRAK2	O94768	0.11 (0.033)	0.00082	0.07134	0.09 (0.033)	0.0061	0.395455
DRG-1	Q9NP79	0.2 (0.091)	0.028	0.205281	0.13 (0.087)	0.14	0.615152
DRR1	O95990	0.023 (0.019)	0.23	0.526579	0.021 (0.02 )	0.28	0.733735
DSC2	Q02487	-0.016 (0.026)	0.54	0.786496	-0.0063 (0.025)	0.8	0.949955
DSC3	Q14574	0.028 (0.067)	0.68	0.868297	0.053 (0.069)	0.44	0.833382
DSCAM	O60469	-0.028 (0.042)	0.5	0.763158	-0.017 (0.043)	0.69	0.916955
Dtk	Q06418	-0.0098 (0.035)	0.78	0.9164	-0.0024 (0.036)	0.95	0.98004
DUS3	P51452	0.1 (0.093)	0.28	0.580922	0.059 (0.091)	0.52	0.868886
Dynactin subunit 2	Q13561	-0.046 (0.031)	0.14	0.39375	-0.029 (0.03 )	0.32	0.758187
DYRK3	O43781	0.025 (0.034)	0.46	0.737469	0.0084 (0.034)	0.81	0.954878
ECM1	Q16610	-0.036 (0.025)	0.15	0.407813	-0.04 (0.026)	0.12	0.573626
EDA	Q92838	-0.11 (0.035)	0.0026	0.101138	-0.098 (0.035)	0.0059	0.395455
EDAR	Q9UNE0	0.055 (0.063)	0.38	0.671951	0.045 (0.063)	0.47	0.84834
EF-1-beta	P24534	0.14 (0.058)	0.018	0.177955	0.11 (0.056)	0.05	0.48694
EFNB1	P98172	0.05 (0.027)	0.062	0.279	0.055 (0.027)	0.045	0.482953
EFNB2	P52799	-0.05 (0.057)	0.39	0.676795	-0.03 (0.059)	0.61	0.88647
EGF	P01133	0.031 (0.04 )	0.44	0.723174	-0.018 (0.037)	0.63	0.894614
EGFRvIII	P00533	0.18 (0.077)	0.017	0.176071	0.17 (0.079)	0.036	0.474545
EG-VEGF	P58294	-0.028 (0.031)	0.36	0.653408	-0.033 (0.031)	0.29	0.737719
eIF-4H	Q15056	0.059 (0.11 )	0.61	0.831818	0.025 (0.11 )	0.82	0.959559
eIF-5	P55010	0.021 (0.032)	0.5	0.763158	0.021 (0.032)	0.51	0.867731
eIF-5A-1	P63241	0.15 (0.069)	0.025	0.198421	0.096 (0.066)	0.14	0.615152
Elafin	P19957	0.005 (0.049)	0.92	0.964337	-0.009 (0.049)	0.85	0.959559
Elastase	P08246	0.42 (0.12 )	0.00045	0.058725	0.35 (0.12 )	0.0034	0.395455
EMAP-2	Q12904	0.016 (0.052)	0.76	0.909074	0.005 (0.053)	0.93	0.974037
EMR2	Q9UHX3	-0.052 (0.035)	0.14	0.39375	-0.033 (0.034)	0.34	0.767647
ENA-78	P42830	0.044 (0.027)	0.1	0.33038	0.028 (0.027)	0.3	0.740076
Endocan	Q9NQ30	-0.055 (0.04 )	0.17	0.444589	-0.027 (0.041)	0.5	0.866534
Endoglin	P17813	-0.033 (0.047)	0.49	0.760345	-0.014 (0.048)	0.77	0.942636
Endostatin	P39060	-0.03 (0.026)	0.24	0.540933	-0.019 (0.024)	0.43	0.831333
Endothelin-converting enzyme 1	P42892	-0.067 (0.03 )	0.028	0.205281	-0.054 (0.031)	0.086	0.542174
ENPP7	Q6UWV6	0.036 (0.079)	0.65	0.84825	-0.0019 (0.08 )	0.98	0.989095
Enterokinase	P98073	0.019 (0.024)	0.45	0.73041	0.016 (0.025)	0.53	0.868927
ENTP3	O75355	0.0011 (0.04 )	0.98	0.988331	2e-04 (0.041)	1	1
ENTP5	O75356	-0.057 (0.026)	0.031	0.205355	-0.051 (0.027)	0.057	0.50602
Eotaxin	P51671	0.012 (0.044)	0.79	0.9164	-0.0044 (0.044)	0.92	0.970574
Eotaxin-2	O00175	0.028 (0.047)	0.55	0.793094	0.044 (0.048)	0.36	0.779104
Eotaxin-3	Q9Y258	0.074 (0.044)	0.093	0.33038	0.057 (0.045)	0.21	0.675
EP15R	Q9UBC2	0.042 (0.044)	0.34	0.6375	0.0093 (0.043)	0.83	0.959559
EphA1	P21709	-0.043 (0.075)	0.57	0.804162	-0.01 (0.076)	0.9	0.967463
EPHA3	P29320	0.082 (0.044)	0.064	0.280268	0.11 (0.045)	0.018	0.419464
EphA5	P54756	-0.018 (0.049)	0.71	0.880751	0.0011 (0.05 )	0.98	0.989095
EPHAA	Q5JZY3	-0.0068 (0.042)	0.87	0.947705	-0.0093 (0.043)	0.83	0.959559
EPHB2	P29323	-0.0065 (0.032)	0.84	0.936123	-0.0024 (0.032)	0.94	0.97745
EphB4	P54760	0.087 (0.031)	0.0047	0.1125	0.065 (0.031)	0.033	0.457423
EphB6	O15197	-0.045 (0.025)	0.071	0.294143	-0.026 (0.024)	0.28	0.733735
Ephrin-A2	O43921	-0.032 (0.021)	0.13	0.378683	-0.0055 (0.02 )	0.79	0.947564
Ephrin-A3	P52797	0.046 (0.032)	0.15	0.407813	0.056 (0.033)	0.086	0.542174
Ephrin-A4	P52798	-0.0077 (0.025)	0.76	0.909074	-0.00084 (0.025)	0.97	0.985097
Ephrin-A5	P52803	-0.072 (0.036)	0.047	0.24534	-0.043 (0.036)	0.23	0.69159
Ephrin-B3	Q15768	0.0041 (0.033)	0.9	0.961129	-0.01 (0.033)	0.75	0.939205
EPI	O14944	-0.037 (0.058)	0.53	0.779763	-0.07 (0.058)	0.23	0.69159
Epithelial cell kinase	P29317	0.042 (0.039)	0.28	0.580922	0.049 (0.04 )	0.22	0.685203
Epo	P01588	-0.068 (0.054)	0.21	0.501005	-0.035 (0.055)	0.52	0.868886
EPO-R	P19235	0.06 (0.027)	0.026	0.198421	0.044 (0.027)	0.11	0.567391
ER	P03372	0.025 (0.033)	0.46	0.737469	0.015 (0.034)	0.66	0.905678
ERAB	Q99714	0.13 (0.089)	0.14	0.39375	0.057 (0.085)	0.5	0.866534
ERBB1	P00533	-0.048 (0.021)	0.02	0.186429	-0.038 (0.021)	0.062	0.516102
ERBB2	P04626	-0.048 (0.037)	0.19	0.471388	-0.037 (0.038)	0.33	0.758187
ERBB3	P21860	0.044 (0.039)	0.27	0.57107	0.054 (0.04 )	0.18	0.6612
ERBB4	Q15303	-0.0048 (0.02 )	0.81	0.926424	-0.0067 (0.02 )	0.74	0.939205
ERK-1	P27361	0.18 (0.08 )	0.022	0.192685	0.12 (0.076)	0.12	0.573626
ERP29	P30040	-0.019 (0.028)	0.49	0.760345	-0.0092 (0.028)	0.74	0.939205
ESAM	Q96AP7	0.0027 (0.026)	0.92	0.964337	-0.0023 (0.027)	0.93	0.974037
Esterase D	P10768	-0.03 (0.05 )	0.55	0.793094	-0.018 (0.051)	0.72	0.930297
ETHE1	O95571	-0.0013 (0.035)	0.97	0.985864	-0.0062 (0.036)	0.86	0.963348
FABP	P05413	-0.08 (0.058)	0.17	0.444589	0.0069 (0.051)	0.89	0.967463
FABPE	Q01469	0.12 (0.045)	0.0064	0.124657	0.11 (0.045)	0.014	0.416489
FABPL	P07148	0.024 (0.063)	0.71	0.880751	0.028 (0.065)	0.67	0.909834
Factor B	P00751	0.0072 (0.021)	0.73	0.89619	-0.0092 (0.02 )	0.65	0.903355
Factor D	P00746	-0.023 (0.027)	0.4	0.679688	-0.016 (0.027)	0.56	0.871037
Factor H	P08603	0.0021 (0.019)	0.91	0.96392	-0.011 (0.019)	0.58	0.880116
Factor I	P05156	-0.027 (0.017)	0.11	0.350122	-0.023 (0.017)	0.17	0.641185
FAK1	Q05397	0.033 (0.046)	0.48	0.751981	0.032 (0.047)	0.5	0.866534
FAM107B	Q9H098	-0.046 (0.048)	0.34	0.6375	-0.022 (0.048)	0.65	0.903355
FAM3B	P58499	0.0018 (0.037)	0.96	0.981049	-0.00034 (0.037)	0.99	0.994573
FAM3D	Q96BQ1	0.05 (0.084)	0.55	0.793094	0.065 (0.085)	0.45	0.844304
Fas ligand, soluble	P48023	-0.11 (0.066)	0.1	0.33038	-0.1 (0.069)	0.14	0.615152
Fas, soluble	P25445	-0.027 (0.029)	0.37	0.661438	-0.028 (0.028)	0.33	0.758187
FBLN3	Q12805	0.037 (0.024)	0.12	0.365888	0.039 (0.023)	0.095	0.552966
FCAR	P24071	0.035 (0.041)	0.4	0.679688	0.051 (0.043)	0.23	0.69159
FCG2A	P12318	-0.054 (0.22 )	0.81	0.926424	-0.02 (0.22 )	0.93	0.974037
FCG2B	P31994	0.076 (0.078)	0.33	0.628686	0.11 (0.08 )	0.17	0.641185
FCG3B	O75015	0.016 (0.04 )	0.69	0.87	0.027 (0.041)	0.51	0.867731
FCGR1	P12314	0.07 (0.041)	0.09	0.328073	0.055 (0.042)	0.19	0.6612
FCN1	O00602	0.072 (0.05 )	0.16	0.427869	0.078 (0.051)	0.13	0.591115
FCN2	Q15485	0.023 (0.031)	0.46	0.737469	0.024 (0.031)	0.44	0.833382
FCRL3	Q96P31	0.00077 (0.042)	0.99	0.993808	0.0017 (0.043)	0.97	0.985097
FER	P16591	0.32 (0.14 )	0.024	0.198228	0.22 (0.13 )	0.1	0.552966
Ferritin	P02794 P02792	0.045 (0.11 )	0.69	0.87	-0.036 (0.11 )	0.74	0.939205
FETUB	Q9UGM5	0.0099 (0.057)	0.86	0.944697	0.036 (0.058)	0.54	0.868927
FGF-10	O15520	0.055 (0.035)	0.12	0.365888	0.027 (0.035)	0.44	0.833382
FGF-12	P61328	-0.011 (0.02 )	0.58	0.810385	-0.011 (0.021)	0.6	0.880765
FGF-16	O43320	0.18 (0.068)	0.0082	0.128965	0.12 (0.065)	0.066	0.516102
FGF-17	O60258	0.042 (0.026)	0.1	0.33038	0.053 (0.027)	0.047	0.482953
FGF-18	O76093	0.054 (0.035)	0.13	0.378683	0.036 (0.036)	0.31	0.750557
FGF-19	O95750	-0.072 (0.087)	0.41	0.690387	-0.047 (0.089)	0.6	0.880765
FGF-20	Q9NP95	-0.0089 (0.03 )	0.77	0.9135	-0.00086 (0.031)	0.98	0.989095
FGF23	Q9GZV9	-0.029 (0.051)	0.57	0.804162	-0.0034 (0.052)	0.95	0.98004
FGF-4	P08620	0.037 (0.046)	0.42	0.701793	0.036 (0.046)	0.44	0.833382
FGF-5	P12034	0.013 (0.049)	0.79	0.9164	0.011 (0.051)	0.83	0.959559
FGF-6	P10767	0.1 (0.053)	0.058	0.275236	0.065 (0.052)	0.21	0.675
FGF7	P21781	0.099 (0.042)	0.02	0.186429	0.067 (0.042)	0.11	0.567391
FGF-8A	P55075	0.12 (0.062)	0.052	0.258023	0.09 (0.062)	0.15	0.619462
FGF-8B	P55075	-0.0035 (0.05 )	0.95	0.978493	-0.009 (0.052)	0.86	0.963348
FGF9	P31371	0.008 (0.038)	0.83	0.93375	0.0027 (0.039)	0.94	0.97745
FGFR-2	P21802	0.077 (0.068)	0.25	0.548319	0.11 (0.069)	0.12	0.573626
FGFR-3	P22607	-0.0064 (0.029)	0.83	0.93375	-0.02 (0.03 )	0.51	0.867731
FGFR4	P22455	0.17 (0.089)	0.052	0.258023	0.17 (0.092)	0.067	0.516102
FGR	P09769	0.11 (0.08 )	0.16	0.427869	0.09 (0.08 )	0.26	0.714316
Fibrinogen	P02671 P02675 P02679	0.0078 (0.086)	0.93	0.972476	0.025 (0.088)	0.78	0.943373
Fibrinogen g-chain dimer	P02679	0.026 (0.079)	0.74	0.899162	0.037 (0.081)	0.64	0.900971
Fibronectin	P02751	-0.058 (0.05 )	0.25	0.548319	-0.053 (0.05 )	0.3	0.740076
Ficolin-3	O75636	-0.046 (0.17 )	0.79	0.9164	-0.088 (0.17 )	0.6	0.880765
FLRT1	Q9NZU1	0.13 (0.038)	0.00071	0.0712731	0.1 (0.037)	0.006	0.395455
FLRT2	O43155	0.01 (0.031)	0.74	0.899162	0.018 (0.032)	0.58	0.880116
FLRT3	Q9NZU0	-0.006 (0.059)	0.92	0.964337	-0.012 (0.061)	0.85	0.959559
Flt-3	P36888	0.13 (0.065)	0.055	0.266822	0.077 (0.064)	0.23	0.69159
Flt3 ligand	P49771	-0.01 (0.049)	0.84	0.936123	-0.0064 (0.051)	0.9	0.967463
FN1.3	P02751	-0.054 (0.046)	0.24	0.540933	-0.054 (0.046)	0.24	0.699107
FN1.4	P02751	-0.081 (0.031)	0.0082	0.128965	-0.073 (0.03 )	0.018	0.419464
Fractalkine/CX3CL-1	P78423	-0.015 (0.039)	0.69	0.87	-0.0054 (0.039)	0.89	0.967463
FSH	P01215, P01225	-0.34 (0.15 )	0.027	0.2025	-0.065 (0.089)	0.46	0.844304
FST	P19883	0.097 (0.032)	0.0028	0.101138	0.076 (0.032)	0.016	0.419464
FSTL1	Q12841	-0.0022 (0.016)	0.89	0.958292	-0.0025 (0.016)	0.88	0.967463
FSTL3	O95633	-0.0049 (0.031)	0.87	0.947705	0.02 (0.029)	0.49	0.865291
FTCD	O95954	0.12 (0.11 )	0.31	0.604709	0.14 (0.12 )	0.25	0.704644
Fucosyltransferase 3	P21217	0.06 (0.062)	0.33	0.628686	0.055 (0.064)	0.38	0.799839
FUT5	Q11128	0.046 (0.052)	0.38	0.671951	0.036 (0.05 )	0.47	0.84834
FYN	P06241	0.11 (0.089)	0.21	0.501005	0.065 (0.088)	0.46	0.844304
GA733-1 protein	P09758	0.027 (0.073)	0.71	0.880751	0.039 (0.075)	0.6	0.880765
Galectin-2	P05162	0.056 (0.049)	0.25	0.548319	0.063 (0.05 )	0.21	0.675
Galectin-3	P17931	-0.044 (0.027)	0.1	0.33038	-0.019 (0.026)	0.46	0.844304
Galectin-4	P56470	0.098 (0.036)	0.0075	0.128783	0.092 (0.037)	0.014	0.416489
Galectin-7	P47929	0.076 (0.038)	0.046	0.24534	0.049 (0.038)	0.19	0.6612
Galectin-8	O00214	0.0043 (0.037)	0.91	0.96392	-0.01 (0.039)	0.8	0.949955
GAPDH, liver	P04406	0.24 (0.087)	0.0061	0.124383	0.16 (0.082)	0.053	0.49759
GAS1	P54826	-0.014 (0.026)	0.59	0.818225	0.0085 (0.027)	0.75	0.939205
Gastrin-releasing peptide	P07492	0.062 (0.042)	0.14	0.39375	0.078 (0.042)	0.064	0.516102
GCKR	Q14397	0.0013 (0.043)	0.98	0.988331	-0.009 (0.044)	0.84	0.959559
GCP-2	P80162	0.1 (0.062)	0.1	0.33038	0.065 (0.06 )	0.28	0.733735
G-CSF	P09919	0.071 (0.069)	0.31	0.604709	0.084 (0.071)	0.24	0.699107
G-CSF-R	Q99062	0.033 (0.043)	0.44	0.723174	0.013 (0.045)	0.76	0.939205
GDF-11	O95390	0.025 (0.049)	0.61	0.831818	0.029 (0.05 )	0.56	0.871037
GDF-11/8	O95390 O14793	0.036 (0.035)	0.3	0.604709	0.012 (0.032)	0.7	0.920867
GDF2	Q9UK05	-0.033 (0.032)	0.31	0.604709	-0.026 (0.033)	0.43	0.831333
GDF-9	O60383	0.099 (0.05 )	0.051	0.255981	0.094 (0.051)	0.066	0.516102
GDNF	P39905	0.041 (0.04 )	0.31	0.604709	0.049 (0.042)	0.24	0.699107
Gelsolin	P06396	-0.044 (0.029)	0.13	0.378683	-0.043 (0.03 )	0.15	0.619462
GFAP	P14136	0.023 (0.065)	0.73	0.89619	0.026 (0.067)	0.7	0.920867
GFRa-1	P56159	-0.092 (0.034)	0.0073	0.12876	-0.078 (0.035)	0.025	0.423701
GFRa-2	O00451	-0.018 (0.026)	0.49	0.760345	0.004 (0.026)	0.88	0.967463
GFRa-3	O60609	0.033 (0.043)	0.44	0.723174	0.018 (0.044)	0.68	0.912025
GHC2	Q9H1K4	0.0089 (0.048)	0.85	0.940042	0.0017 (0.049)	0.97	0.985097
ghrelin	Q9UBU3	-0.049 (0.043)	0.26	0.560826	-0.044 (0.043)	0.3	0.740076
GI24	Q9H7M9	0.077 (0.027)	0.0044	0.1125	0.068 (0.027)	0.01	0.395455
GIB	P04054	-0.055 (0.06 )	0.36	0.653408	-0.056 (0.062)	0.36	0.779104
GIIE	Q9NZK7	-0.027 (0.033)	0.42	0.701793	-0.024 (0.034)	0.48	0.85457
GITR	Q9Y5U5	-0.11 (0.078)	0.18	0.452601	-0.08 (0.079)	0.31	0.750557
Glucagon	P01275	-0.098 (0.074)	0.19	0.471388	-0.051 (0.075)	0.5	0.866534
Glucocorticoid receptor	P04150	0.082 (0.047)	0.083	0.317639	0.087 (0.048)	0.069	0.516102
Glutamate carboxypeptidase	Q96KP4	0.0075 (0.03 )	0.8	0.922261	-0.0055 (0.029)	0.85	0.959559
Glutathione S-transferase Pi	P09211	0.01 (0.048)	0.83	0.93375	0.011 (0.049)	0.83	0.959559
Glypican 3	P51654	-0.095 (0.039)	0.015	0.163125	-0.047 (0.038)	0.22	0.685203
GM-CSF	P04141	0.091 (0.088)	0.3	0.604709	0.11 (0.091)	0.21	0.675
GNS	P15586	-0.026 (0.054)	0.63	0.839785	-0.034 (0.055)	0.54	0.868927
GOT1	P17174	0.041 (0.025)	0.11	0.350122	0.044 (0.026)	0.097	0.552966
GP114	Q8IZF4	0.027 (0.027)	0.31	0.604709	0.017 (0.027)	0.54	0.868927
gp130, soluble	P40189	-0.017 (0.02 )	0.39	0.676795	-0.014 (0.021)	0.5	0.866534
GP1BA	P07359	-0.0076 (0.024)	0.75	0.905412	-0.008 (0.024)	0.74	0.939205
GPC2	Q8N158	0.068 (0.045)	0.13	0.378683	0.076 (0.046)	0.1	0.552966
GPC5	P78333	-0.049 (0.043)	0.25	0.548319	-0.024 (0.044)	0.59	0.880765
GPC6	Q9Y625	0.0061 (0.028)	0.82	0.932143	0.0058 (0.028)	0.84	0.959559
GPDA	P21695	0.017 (0.061)	0.79	0.9164	0.042 (0.062)	0.5	0.866534
gpIIbIIIa	P08514 P05106	0.13 (0.066)	0.044	0.242278	0.1 (0.067)	0.12	0.573626
GPNMB	Q14956	-0.057 (0.032)	0.08	0.312575	-0.033 (0.032)	0.3	0.740076
GPVI	Q9HCN6	0.1 (0.077)	0.2	0.48423	0.056 (0.075)	0.46	0.844304
Granulysin	P22749	0.089 (0.057)	0.12	0.365888	0.11 (0.057)	0.046	0.482953
granzyme A	P12544	-0.037 (0.038)	0.32	0.617751	-0.014 (0.038)	0.71	0.925624
Granzyme B	P10144	-0.017 (0.043)	0.69	0.87	-0.005 (0.043)	0.91	0.969429
Granzyme H	P20718	0.062 (0.039)	0.12	0.365888	0.054 (0.04 )	0.18	0.6612
GRB2 adapter protein	P62993	0.15 (0.12 )	0.21	0.501005	0.088 (0.11 )	0.43	0.831333
GRB2-related adapter protein 2	O75791	0.0059 (0.051)	0.91	0.96392	-0.0041 (0.052)	0.94	0.97745
GREM1	O60565	0.074 (0.037)	0.049	0.252747	0.047 (0.037)	0.21	0.675
GRN	P28799	0.0042 (0.023)	0.85	0.940042	0.0094 (0.023)	0.68	0.912025
Gro-a	P09341	0.049 (0.067)	0.47	0.744357	0.018 (0.064)	0.78	0.943373
Gro-b/g	P19876 P19875	0.16 (0.072)	0.031	0.205355	0.14 (0.07 )	0.051	0.491739
Growth hormone receptor	P10912	-0.1 (0.047)	0.033	0.213193	-0.047 (0.046)	0.31	0.750557
GSK-3 alpha/beta	P49840 P49841	0.23 (0.094)	0.016	0.168387	0.15 (0.089)	0.083	0.542174
GSTA3	Q16772	-0.064 (0.078)	0.41	0.690387	-0.086 (0.08 )	0.28	0.733735
GV	P39877	0.057 (0.027)	0.038	0.229583	0.044 (0.028)	0.11	0.567391
GX	O15496	-0.016 (0.026)	0.54	0.786496	-0.017 (0.027)	0.53	0.868927
H2A3	Q7L7L0	0.019 (0.041)	0.65	0.84825	0.018 (0.042)	0.67	0.909834
H2B2E	Q16778	0.024 (0.06 )	0.69	0.87	0.0047 (0.06 )	0.94	0.97745
H31	P68431	-0.026 (0.037)	0.48	0.751981	-0.031 (0.037)	0.4	0.815625
H6ST1	O60243	-0.025 (0.021)	0.24	0.540933	-0.0081 (0.021)	0.7	0.920867
HAI-1	O43278	-0.046 (0.048)	0.34	0.6375	-0.046 (0.05 )	0.35	0.774153
Haptoglobin, Mixed Type	P00738	0.099 (0.11 )	0.39	0.676795	0.088 (0.11 )	0.44	0.833382
Hat1	O14929	0.048 (0.047)	0.31	0.604709	0.0054 (0.046)	0.91	0.969429
HB-EGF	Q99075	-0.016 (0.055)	0.77	0.9135	-0.028 (0.056)	0.62	0.894033
HCC-1	Q16627	-0.049 (0.039)	0.22	0.511765	-0.041 (0.039)	0.3	0.740076
HCC-4	O15467	0.025 (0.044)	0.58	0.810385	0.024 (0.044)	0.59	0.880765
HCG	P01215,P01233	-0.32 (0.16 )	0.047	0.24534	-0.069 (0.11 )	0.53	0.868927
HCK	P08631	-0.068 (0.028)	0.016	0.168387	-0.068 (0.029)	0.019	0.420254
HDAC8	Q9BY41	0.094 (0.031)	0.0029	0.101138	0.082 (0.031)	0.0094	0.395455
HDGR2	Q7Z4V5	0.094 (0.03 )	0.0021	0.101138	0.09 (0.031)	0.0041	0.395455
HEMK2	Q9Y5N5	0.11 (0.065)	0.1	0.33038	0.061 (0.062)	0.33	0.758187
Hemoglobin	P69905, P68871	0.043 (0.11 )	0.7	0.875839	0.013 (0.11 )	0.9	0.967463
Hemopexin	P02790	0.02 (0.081)	0.81	0.926424	0.05 (0.083)	0.55	0.871037
Heparin cofactor II	P05546	0.023 (0.026)	0.39	0.676795	0.021 (0.026)	0.43	0.831333
HGF	P14210	0.047 (0.056)	0.4	0.679688	0.023 (0.057)	0.69	0.916955
HGFA	Q04756	-0.037 (0.053)	0.49	0.760345	-0.044 (0.055)	0.43	0.831333
HGH	P01241	0.034 (0.07 )	0.63	0.839785	0.022 (0.072)	0.76	0.939205
HHLA2	Q9UM44	0.18 (0.076)	0.022	0.192685	0.15 (0.078)	0.048	0.48694
HIF-1a	Q16665	0.048 (0.035)	0.17	0.444589	0.045 (0.036)	0.21	0.675
HINT1	P49773	0.096 (0.044)	0.029	0.205355	0.081 (0.044)	0.069	0.516102
HIPK3	Q9H422	-0.07 (0.093)	0.45	0.73041	-0.074 (0.092)	0.42	0.829198
Histone H1.2	P16403	0.13 (0.1 )	0.2	0.48423	0.14 (0.11 )	0.19	0.6612
Histone H2A.z	P0C0S5	0.049 (0.054)	0.37	0.661438	0.029 (0.053)	0.58	0.880116
HIV-2 Rev	P18093	0.011 (0.03 )	0.72	0.888091	0.015 (0.031)	0.61	0.88647
HMG-1	P09429	0.14 (0.046)	0.0031	0.101138	0.1 (0.045)	0.024	0.423701
HMGN1	P05114	-0.012 (0.039)	0.75	0.905412	0.012 (0.04 )	0.76	0.939205
HMGR	P04035	0.1 (0.055)	0.064	0.280268	0.094 (0.057)	0.097	0.552966
hnRNP A/B	Q99729	0.15 (0.047)	0.0012	0.0921176	0.12 (0.046)	0.0074	0.395455
hnRNP A2/B1	P22626	0.14 (0.049)	0.0047	0.1125	0.11 (0.049)	0.022	0.422206
hnRNP K	P61978	-0.012 (0.054)	0.83	0.93375	-0.01 (0.055)	0.85	0.959559
HNRPQ	O60506	0.033 (0.029)	0.26	0.560826	0.02 (0.029)	0.5	0.866534
HO-2	P30519	0.0062 (0.038)	0.87	0.947705	0.00049 (0.039)	0.99	0.994573
HPG-	P15428	0.034 (0.035)	0.34	0.6375	0.019 (0.035)	0.58	0.880116
HPLN1	P10915	0.1 (0.046)	0.027	0.2025	0.079 (0.046)	0.089	0.547854
HPV E7 Type 16	P03129	0.025 (0.041)	0.54	0.786496	0.01 (0.042)	0.81	0.954878
HPV E7 Type18	P06788	0.017 (0.024)	0.47	0.744357	0.0081 (0.025)	0.74	0.939205
HRG	P04196	-0.058 (0.034)	0.088	0.32625	-0.035 (0.034)	0.3	0.740076
HSP 27	P04792	0.17 (0.1 )	0.1	0.33038	0.12 (0.1 )	0.22	0.685203
HSP 40	P25685	0.15 (0.064)	0.022	0.192685	0.1 (0.062)	0.093	0.552966
HSP 60	P10809	0.1 (0.11 )	0.37	0.661438	0.048 (0.11 )	0.67	0.909834
HSP 70	P0DMV8	-0.0099 (0.035)	0.77	0.9135	-0.013 (0.035)	0.7	0.920867
HSP 90a/b	P07900 P08238	0.15 (0.069)	0.029	0.205355	0.11 (0.066)	0.1	0.552966
HSP 90b	P08238	0.13 (0.06 )	0.03	0.205355	0.093 (0.057)	0.1	0.552966
HSP70 protein 8	P11142	0.091 (0.031)	0.004	0.111064	0.073 (0.031)	0.018	0.419464
HTRA2	O43464	0.049 (0.04 )	0.22	0.511765	0.036 (0.04 )	0.37	0.787684
HVEM	Q92956	0.076 (0.036)	0.037	0.227759	0.076 (0.037)	0.042	0.482953
HXK1	P19367	0.072 (0.043)	0.095	0.33038	0.073 (0.044)	0.099	0.552966
HXK2	P52789	0.18 (0.061)	0.0038	0.111064	0.16 (0.062)	0.01	0.395455
I-309	P22362	0.027 (0.038)	0.48	0.751981	0.024 (0.039)	0.53	0.868927
iC3b	P01024	-0.048 (0.052)	0.35	0.645127	-0.012 (0.053)	0.82	0.959559
ICOS	Q9Y6W8	-0.011 (0.051)	0.82	0.932143	-0.015 (0.052)	0.77	0.942636
IDE	P14735	0.097 (0.043)	0.026	0.198421	0.063 (0.042)	0.14	0.615152
IDS	P22304	-0.12 (0.045)	0.0057	0.121943	-0.1 (0.046)	0.025	0.423701
IDUA	P35475	0.0025 (0.044)	0.96	0.981049	-0.0089 (0.045)	0.84	0.959559
IF4A3	P38919	0.13 (0.045)	0.005	0.1125	0.12 (0.046)	0.009	0.395455
IF4G2	P78344	0.14 (0.12 )	0.26	0.560826	0.075 (0.12 )	0.53	0.868927
IFN10	P01566	-0.079 (0.053)	0.14	0.39375	-0.08 (0.055)	0.15	0.619462
IFN-a/b R1	P17181	-0.038 (0.048)	0.43	0.713024	-0.024 (0.048)	0.62	0.894033
IFNA7	P01567	0.026 (0.051)	0.61	0.831818	0.021 (0.053)	0.69	0.916955
IFN-aA	P01563	-0.051 (0.024)	0.031	0.205355	-0.048 (0.024)	0.047	0.482953
IFN-b	P01574	-0.019 (0.063)	0.76	0.909074	-0.0092 (0.065)	0.89	0.967463
IFN-g	P01579	0.048 (0.047)	0.31	0.604709	0.056 (0.049)	0.25	0.704644
IFN-g R1	P15260	-0.015 (0.049)	0.76	0.909074	0.009 (0.05 )	0.86	0.963348
IFN-lambda 1	Q8IU54	0.081 (0.037)	0.029	0.205355	0.06 (0.036)	0.1	0.552966
IFN-lambda 2	Q8IZJ0	0.0044 (0.033)	0.89	0.958292	0.0035 (0.034)	0.92	0.970574
IgA	P01876 P01877	0.023 (0.05 )	0.64	0.847059	0.016 (0.05 )	0.75	0.939205
IgD	P01880	0.12 (0.18 )	0.51	0.765	0.06 (0.19 )	0.75	0.939205
IgE	P01854	0.12 (0.19 )	0.53	0.779763	-0.082 (0.19 )	0.67	0.909834
IGFBP-1	P08833	0.12 (0.1 )	0.23	0.526579	0.093 (0.1 )	0.36	0.779104
IGFBP-2	P18065	0.052 (0.061)	0.4	0.679688	0.033 (0.061)	0.58	0.880116
IGFBP-3	P17936	-0.015 (0.046)	0.74	0.899162	0.022 (0.044)	0.63	0.894614
IGFBP-4	P22692	0.025 (0.024)	0.3	0.604709	0.023 (0.024)	0.34	0.767647
IGFBP-5	P24593	0.036 (0.022)	0.099	0.33038	0.02 (0.021)	0.34	0.767647
IGFBP-6	P24592	-0.0051 (0.031)	0.87	0.947705	-0.011 (0.029)	0.7	0.920867
IGFBP-7	Q16270	-0.0064 (0.024)	0.79	0.9164	-0.011 (0.025)	0.65	0.903355
IGF-I	P05019	0.036 (0.032)	0.26	0.560826	0.037 (0.032)	0.24	0.699107
IGF-I sR	P08069	0.011 (0.027)	0.7	0.875839	0.0048 (0.028)	0.86	0.963348
IGF-II receptor	P11717	-0.00063 (0.023)	0.98	0.988331	0.0017 (0.023)	0.94	0.97745
IgG	P01857	-0.0071 (0.032)	0.83	0.93375	-0.012 (0.033)	0.71	0.925624
IgM	P01871	-0.02 (0.073)	0.78	0.9164	-0.02 (0.074)	0.79	0.947564
IL-1 R AcP	Q9NPH3	-0.068 (0.043)	0.11	0.350122	-0.046 (0.043)	0.29	0.737719
IL-1 R4	Q01638	0.022 (0.05 )	0.66	0.854464	0.0015 (0.048)	0.97	0.985097
IL-1 sR9	Q9NP60	-0.0016 (0.055)	0.98	0.988331	0.021 (0.056)	0.71	0.925624
IL-1 sRI	P14778	-0.0037 (0.046)	0.94	0.976672	-0.006 (0.047)	0.9	0.967463
IL-1 sRII	P27930	-0.017 (0.027)	0.53	0.779763	-0.0086 (0.027)	0.75	0.939205
IL-10	P22301	0.0052 (0.044)	0.91	0.96392	0.0061 (0.045)	0.89	0.967463
IL-10 Ra	Q13651	-0.018 (0.017)	0.31	0.604709	-0.013 (0.018)	0.47	0.84834
IL-10 Rb	Q08334	0.0097 (0.029)	0.74	0.899162	0.01 (0.03 )	0.74	0.939205
IL-11	P20809	0.069 (0.037)	0.061	0.279	0.054 (0.037)	0.15	0.619462
IL-12	P29459, P29460	-0.011 (0.049)	0.83	0.93375	-0.0079 (0.05 )	0.87	0.965434
IL-12 Rb1	P42701	0.057 (0.031)	0.065	0.28275	0.045 (0.031)	0.16	0.63465
IL-12 RB2	Q99665	0.041 (0.064)	0.52	0.773774	0.029 (0.066)	0.66	0.905678
IL-13	P35225	0.032 (0.052)	0.54	0.786496	0.011 (0.053)	0.84	0.959559
IL-13 Ra1	P78552	-0.014 (0.028)	0.61	0.831818	-0.016 (0.029)	0.59	0.880765
IL-15 Ra	Q13261	0.041 (0.028)	0.13	0.378683	0.05 (0.028)	0.073	0.527705
IL-16	Q14005	0.049 (0.021)	0.017	0.176071	0.052 (0.021)	0.015	0.416489
IL-17	Q16552	0.04 (0.038)	0.29	0.595984	0.041 (0.039)	0.29	0.737719
IL-17 RC	Q8NAC3	-0.03 (0.034)	0.39	0.676795	-0.025 (0.035)	0.48	0.85457
IL-17 RD	Q8NFM7	0.033 (0.029)	0.24	0.540933	0.026 (0.029)	0.37	0.787684
IL-17 sR	Q96F46	0.0028 (0.054)	0.96	0.981049	0.0031 (0.055)	0.96	0.982588
IL-17B	Q9UHF5	-0.049 (0.019)	0.01	0.140323	-0.044 (0.019)	0.025	0.423701
IL-17B R	Q9NRM6	0.022 (0.053)	0.68	0.868297	0.016 (0.054)	0.77	0.942636
IL-17D	Q8TAD2	0.031 (0.044)	0.48	0.751981	0.025 (0.045)	0.57	0.880116
IL-17E	Q9H293	0.046 (0.033)	0.16	0.427869	0.036 (0.034)	0.28	0.733735
IL-17F	Q96PD4	-0.007 (0.037)	0.85	0.940042	0.0039 (0.038)	0.92	0.970574
IL-18 BPa	O95998	0.037 (0.043)	0.39	0.676795	0.048 (0.042)	0.26	0.714316
IL-18 Ra	Q13478	0.032 (0.037)	0.39	0.676795	0.027 (0.038)	0.48	0.85457
IL-18 Rb	O95256	0.035 (0.026)	0.18	0.452601	0.035 (0.027)	0.19	0.6612
IL-19	Q9UHD0	-0.006 (0.025)	0.81	0.926424	-0.0016 (0.026)	0.95	0.98004
IL-1a	P01583	-0.031 (0.047)	0.52	0.773774	-0.04 (0.048)	0.4	0.815625
IL-1b	P01584	0.035 (0.049)	0.48	0.751981	0.012 (0.051)	0.82	0.959559
IL-1F6	Q9UHA7	-0.1 (0.09 )	0.25	0.548319	-0.09 (0.092)	0.33	0.758187
IL-1F7	Q9NZH6	-0.0033 (0.041)	0.94	0.976672	0.0052 (0.042)	0.9	0.967463
IL-1F8	Q9NZH7	0.034 (0.047)	0.46	0.737469	0.03 (0.048)	0.53	0.868927
IL-1Ra	P18510	0.011 (0.054)	0.84	0.936123	0.02 (0.055)	0.71	0.925624
IL-1Rrp2	Q9HB29	-0.042 (0.028)	0.14	0.39375	-0.022 (0.029)	0.43	0.831333
IL-2	P60568	-0.047 (0.058)	0.42	0.701793	-0.036 (0.059)	0.54	0.868927
IL-2 sRa	P01589	-0.0072 (0.065)	0.91	0.96392	-0.018 (0.066)	0.78	0.943373
IL-2 sRg	P31785	0.16 (0.064)	0.012	0.15505	0.11 (0.062)	0.07	0.516102
IL-20	Q9NYY1	0.067 (0.049)	0.18	0.452601	0.067 (0.051)	0.19	0.6612
IL-20 Ra	Q9UHF4	0.0041 (0.032)	0.9	0.961129	0.0054 (0.033)	0.87	0.965434
IL-22	Q9GZX6	0.11 (0.065)	0.1	0.33038	0.056 (0.065)	0.39	0.807857
IL-22BP	Q969J5	-0.057 (0.05 )	0.25	0.548319	-0.042 (0.049)	0.39	0.807857
IL22RA1	Q8N6P7	0.0037 (0.049)	0.94	0.976672	-0.011 (0.051)	0.82	0.959559
IL-23	P29460, Q9NPF7	-0.11 (0.054)	0.041	0.231623	-0.024 (0.05 )	0.63	0.894614
IL-23 R	Q5VWK5	0.11 (0.041)	0.0098	0.140323	0.08 (0.04 )	0.047	0.482953
IL24	Q13007	0.019 (0.057)	0.74	0.899162	0.018 (0.059)	0.76	0.939205
IL-27	Q8NEV9 Q14213	-0.036 (0.057)	0.53	0.779763	-0.018 (0.059)	0.76	0.939205
IL-3	P08700	0.04 (0.037)	0.27	0.57107	0.02 (0.037)	0.6	0.880765
IL-3 Ra	P26951	0.092 (0.053)	0.082	0.316598	0.061 (0.052)	0.24	0.699107
IL-34	Q6ZMJ4	0.018 (0.031)	0.56	0.797817	0.028 (0.032)	0.38	0.799839
IL-4	P05112	0.081 (0.037)	0.03	0.205355	0.076 (0.038)	0.046	0.482953
IL-4 sR	P24394	-0.066 (0.05 )	0.18	0.452601	-0.066 (0.05 )	0.19	0.6612
IL-5	P05113	0.074 (0.048)	0.13	0.378683	0.066 (0.05 )	0.19	0.6612
IL-5 Ra	Q01344	-0.024 (0.049)	0.62	0.835847	-0.021 (0.051)	0.67	0.909834
IL-6	P05231	0.035 (0.053)	0.51	0.765	0.018 (0.054)	0.74	0.939205
IL-6 sRa	P08887	-0.0068 (0.034)	0.84	0.936123	0.031 (0.033)	0.35	0.774153
IL-7	P13232	0.024 (0.03 )	0.43	0.713024	0.027 (0.031)	0.37	0.787684
IL-7 Ra	P16871	0.006 (0.042)	0.89	0.958292	0.0069 (0.043)	0.87	0.965434
IL-8	P10145	0.045 (0.029)	0.12	0.365888	0.023 (0.029)	0.42	0.829198
IL-9	P15248	-0.0021 (0.053)	0.97	0.985864	0.0059 (0.053)	0.91	0.969429
ILT-2	Q8NHL6	-0.21 (0.081)	0.012	0.15505	-0.11 (0.073)	0.12	0.573626
ILT-4	Q8N423	-0.018 (0.027)	0.51	0.765	-0.008 (0.028)	0.77	0.942636
IMB1	Q14974	0.079 (0.094)	0.4	0.679688	0.06 (0.093)	0.52	0.868886
IMDH1	P20839	0.096 (0.072)	0.18	0.452601	0.077 (0.072)	0.29	0.737719
IMDH2	P12268	0.11 (0.031)	0.0009	0.0734063	0.081 (0.03 )	0.0083	0.395455
ING1	Q9UK53	0.091 (0.079)	0.25	0.548319	0.056 (0.079)	0.48	0.85457
INGR2	P38484	0.063 (0.034)	0.062	0.279	0.06 (0.034)	0.078	0.541436
Insulin	P01308	0.041 (0.049)	0.41	0.690387	0.049 (0.05 )	0.34	0.767647
Integrin a1b1	P56199, P05556	0.1 (0.053)	0.06	0.279	0.11 (0.053)	0.049	0.48694
Integrin aVb5	P06756, P18084	0.038 (0.062)	0.55	0.793094	0.071 (0.062)	0.25	0.704644
IP-10	P02778	-0.029 (0.062)	0.63	0.839785	-0.0067 (0.06 )	0.91	0.969429
IR	P06213	0.0014 (0.038)	0.97	0.985864	0.03 (0.038)	0.43	0.831333
IRF1	P10914	0.066 (0.065)	0.31	0.604709	0.023 (0.065)	0.72	0.930297
ISLR2	Q6UXK2	0.043 (0.036)	0.23	0.526579	0.021 (0.037)	0.57	0.880116
I-TAC	O14625	0.088 (0.087)	0.31	0.604709	0.087 (0.085)	0.31	0.750557
ITI heavy chain H4	Q14624	-0.017 (0.018)	0.35	0.645127	-0.011 (0.017)	0.54	0.868927
JAG1	P78504	-0.0041 (0.025)	0.87	0.947705	-0.0041 (0.025)	0.87	0.965434
JAG2	Q9Y219	0.022 (0.067)	0.74	0.899162	0.03 (0.068)	0.66	0.905678
JAK2	O60674	-0.055 (0.02 )	0.0074	0.12876	-0.049 (0.021)	0.018	0.419464
JAM-B	P57087	0.014 (0.025)	0.56	0.797817	0.012 (0.025)	0.63	0.894614
JAM-C	Q9BX67	0.15 (0.052)	0.0032	0.101854	0.11 (0.05 )	0.022	0.422206
JAML1	Q86YT9	-0.086 (0.049)	0.079	0.310527	-0.098 (0.05 )	0.052	0.491739
JNK2	P45984	-0.0053 (0.025)	0.83	0.93375	-0.0029 (0.026)	0.91	0.969429
Kallikrein 11	Q9UBX7	0.002 (0.041)	0.96	0.981049	0.0044 (0.042)	0.92	0.970574
kallikrein 12	Q9UKR0	-0.027 (0.042)	0.52	0.773774	-0.033 (0.041)	0.42	0.829198
kallikrein 13	Q9UKR3	-0.0083 (0.027)	0.76	0.909074	-0.027 (0.027)	0.32	0.758187
kallikrein 14	Q9P0G3	0.0053 (0.025)	0.83	0.93375	0.005 (0.025)	0.84	0.959559
Kallikrein 4	Q9Y5K2	-0.015 (0.036)	0.67	0.860581	-0.019 (0.037)	0.6	0.880765
kallikrein 5	Q9Y337	0.051 (0.046)	0.27	0.57107	0.061 (0.048)	0.2	0.674419
Kallikrein 6	Q92876	0.039 (0.076)	0.61	0.831818	0.062 (0.076)	0.42	0.829198
Kallikrein 7	P49862	-0.078 (0.04 )	0.053	0.261	-0.092 (0.04 )	0.023	0.422746
kallikrein 8	O60259	-0.084 (0.046)	0.071	0.294143	-0.094 (0.048)	0.05	0.48694
Kallistatin	P29622	-0.044 (0.021)	0.032	0.210909	-0.046 (0.021)	0.031	0.454551
Karyopherin-a2	P52292	0.012 (0.03 )	0.69	0.87	0.02 (0.031)	0.52	0.868886
KEAP1	Q14145	-0.014 (0.049)	0.78	0.9164	-0.034 (0.051)	0.51	0.867731
Keratin 18	P05783	0.045 (0.041)	0.27	0.57107	0.024 (0.041)	0.56	0.871037
KI2L4	Q99706	0.096 (0.051)	0.059	0.27796	0.074 (0.051)	0.15	0.619462
KI3L2	P43630	0.15 (0.084)	0.075	0.299312	0.15 (0.086)	0.084	0.542174
KI3S1	Q14943	0.11 (0.051)	0.039	0.229956	0.096 (0.052)	0.068	0.516102
KIF23	Q02241	0.17 (0.052)	0.0014	0.101138	0.13 (0.049)	0.0083	0.395455
Kininogen, HMW	P01042	0.021 (0.028)	0.45	0.73041	0.024 (0.029)	0.42	0.829198
KIRR3	Q8IZU9	-0.024 (0.027)	0.38	0.671951	-0.015 (0.028)	0.59	0.880765
KLRF1	Q9NZS2	0.041 (0.043)	0.34	0.6375	0.037 (0.044)	0.39	0.807857
KPCI	P41743	0.18 (0.057)	0.0019	0.101138	0.12 (0.054)	0.023	0.422746
KPCT	Q04759	0.14 (0.08 )	0.09	0.328073	0.094 (0.078)	0.23	0.69159
K-ras	P01116	0.011 (0.029)	0.7	0.875839	0.018 (0.03 )	0.55	0.871037
KREM2	Q8NCW0	0.14 (0.051)	0.0083	0.128965	0.11 (0.049)	0.026	0.435
Ku70	P12956	0.094 (0.033)	0.005	0.1125	0.11 (0.034)	0.0016	0.348
KYNU	Q16719	0.16 (0.046)	0.0004	0.058725	0.12 (0.045)	0.0079	0.395455
Lactoferrin	P02788	0.0046 (0.045)	0.92	0.964337	-0.0012 (0.046)	0.98	0.989095
LAG-1	Q8NHW4	0.046 (0.069)	0.51	0.765	0.034 (0.07 )	0.63	0.894614
LAG-3	P18627	-0.022 (0.048)	0.65	0.84825	0.0042 (0.049)	0.93	0.974037
Lamin-B1	P20700	0.087 (0.029)	0.003	0.101138	0.076 (0.029)	0.01	0.395455
Laminin	P25391, P07942, P11047	0.084 (0.041)	0.04	0.229956	0.064 (0.041)	0.12	0.573626
Layilin	Q6UX15	0.034 (0.04 )	0.4	0.679688	0.056 (0.039)	0.15	0.619462
LBP	P18428	-0.00073 (0.025)	0.98	0.988331	0.0043 (0.025)	0.87	0.965434
LCK	P06239	0.029 (0.046)	0.53	0.779763	0.021 (0.047)	0.66	0.905678
LCMT1	Q9UIC8	0.032 (0.033)	0.33	0.628686	0.0076 (0.032)	0.81	0.954878
LD78-beta	P16619	-0.034 (0.041)	0.41	0.690387	-0.031 (0.042)	0.46	0.844304
LDH-H 1	P07195	0.056 (0.046)	0.23	0.526579	0.036 (0.046)	0.44	0.833382
LDLR	P01130	0.0074 (0.049)	0.88	0.955408	0.037 (0.049)	0.45	0.844304
LEAP-1	P81172	0.13 (0.14 )	0.34	0.6375	0.088 (0.14 )	0.53	0.868927
Lectin, mannose-binding 2	Q12907	0.011 (0.051)	0.83	0.93375	-0.0034 (0.051)	0.95	0.98004
LEG9	O00182	-0.021 (0.038)	0.59	0.818225	-0.007 (0.039)	0.86	0.963348
Leptin	P41159	-0.25 (0.11 )	0.03	0.205355	-0.046 (0.094)	0.62	0.894033
LG3BP	Q08380	0.085 (0.052)	0.11	0.350122	0.099 (0.053)	0.063	0.516102
LGMN	Q99538	0.052 (0.03 )	0.078	0.308455	0.03 (0.029)	0.31	0.750557
LIF sR	P42702	0.0067 (0.028)	0.81	0.926424	0.013 (0.029)	0.65	0.903355
LIGHT	O43557	0.012 (0.044)	0.78	0.9164	0.0018 (0.045)	0.97	0.985097
LIMP II	Q14108	0.033 (0.038)	0.39	0.676795	0.028 (0.04 )	0.48	0.85457
LIN7B	Q9HAP6	0.026 (0.027)	0.35	0.645127	0.019 (0.028)	0.49	0.865291
Lipocalin 2	P80188	0.003 (0.03 )	0.92	0.964337	0.00078 (0.03 )	0.98	0.989095
Livin B	Q96CA5	-0.024 (0.031)	0.44	0.723174	-0.029 (0.032)	0.37	0.787684
LKHA4	P09960	-0.023 (0.047)	0.63	0.839785	-0.023 (0.049)	0.64	0.900971
LPPL	Q05315	-0.032 (0.036)	0.38	0.671951	-0.039 (0.037)	0.3	0.740076
LRIG3	Q6UXM1	-0.035 (0.037)	0.35	0.645127	-0.026 (0.038)	0.5	0.866534
LRP1B	Q9NZR2	0.0038 (0.028)	0.89	0.958292	0.0045 (0.028)	0.87	0.965434
LRP8	Q14114	-0.025 (0.031)	0.42	0.701793	-0.019 (0.032)	0.55	0.871037
LRRK2	Q5S007	-0.0017 (0.045)	0.97	0.985864	-0.0025 (0.046)	0.96	0.982588
LRRT1	Q86UE6	0.044 (0.045)	0.33	0.628686	0.055 (0.046)	0.23	0.69159
LRRT3	Q86VH5	-0.014 (0.043)	0.74	0.899162	-0.0023 (0.044)	0.96	0.982588
LSAMP	Q13449	-0.012 (0.027)	0.67	0.860581	0.0083 (0.025)	0.74	0.939205
LTBP4	Q8N2S1	-0.02 (0.025)	0.43	0.713024	-0.016 (0.025)	0.52	0.868886
Lumican	P51884	0.012 (0.024)	0.63	0.839785	0.0049 (0.024)	0.84	0.959559
Luteinizing hormone	P01215, P01229	-0.068 (0.1 )	0.52	0.773774	0.085 (0.073)	0.25	0.704644
LY86	O95711	0.042 (0.028)	0.14	0.39375	0.027 (0.028)	0.33	0.758187
LY9	Q9HBG7	-0.11 (0.067)	0.11	0.350122	-0.07 (0.068)	0.3	0.740076
Lymphotactin	P47992	0.071 (0.042)	0.091	0.329875	0.057 (0.043)	0.18	0.6612
Lymphotoxin a1/b2	P01374, Q06643	-0.063 (0.038)	0.1	0.33038	-0.047 (0.038)	0.22	0.685203
Lymphotoxin a2/b1	P01374, Q06643	-0.056 (0.03 )	0.06	0.279	-0.046 (0.03 )	0.12	0.573626
Lymphotoxin b R	P36941	-0.0092 (0.039)	0.81	0.926424	-0.0026 (0.039)	0.95	0.98004
LYN	P07948	0.21 (0.12 )	0.082	0.316598	0.12 (0.11 )	0.3	0.740076
LYNB	P07948	0.2 (0.13 )	0.12	0.365888	0.1 (0.12 )	0.41	0.824422
LYPD3	O95274	0.099 (0.046)	0.03	0.205355	0.092 (0.047)	0.05	0.48694
Lysozyme	P61626	-0.0094 (0.021)	0.65	0.84825	-0.015 (0.021)	0.46	0.844304
LYVE1	Q9Y5Y7	0.044 (0.037)	0.24	0.540933	0.06 (0.037)	0.11	0.567391
M2-PK	P14618	0.27 (0.13 )	0.039	0.229956	0.18 (0.12 )	0.14	0.615152
Macrophage mannose receptor	P22897	-0.011 (0.029)	0.71	0.880751	0.0018 (0.03 )	0.95	0.98004
Macrophage scavenger receptor	P21757	0.035 (0.038)	0.36	0.653408	0.022 (0.038)	0.57	0.880116
Mammaglobin 2	O75556	-6.2e-05 (0.034)	1	1	-0.02 (0.034)	0.56	0.871037
MAPK14	Q16539	0.093 (0.065)	0.15	0.407813	0.065 (0.063)	0.3	0.740076
MAPK2	P49137	0.2 (0.1 )	0.05	0.252907	0.13 (0.096)	0.17	0.641185
MAPK5	Q8IW41	0.067 (0.06 )	0.26	0.560826	0.062 (0.061)	0.31	0.750557
MAPKAPK3	Q16644	0.048 (0.073)	0.51	0.765	0.036 (0.075)	0.63	0.894614
Marapsin	Q9BQR3	0.044 (0.029)	0.12	0.365888	0.033 (0.029)	0.26	0.714316
MASP3	P48740	-0.013 (0.027)	0.63	0.839785	-0.0036 (0.027)	0.89	0.967463
MATK	P42679	0.02 (0.04 )	0.63	0.839785	0.015 (0.042)	0.72	0.930297
MATN2	O00339	-0.038 (0.021)	0.067	0.285735	-0.024 (0.021)	0.25	0.704644
MATN3	O15232	0.01 (0.021)	0.63	0.839785	0.0071 (0.022)	0.74	0.939205
MBD4	O95243	0.076 (0.039)	0.052	0.258023	0.044 (0.038)	0.24	0.699107
MBL	P11226	0.017 (0.084)	0.84	0.936123	-0.062 (0.083)	0.45	0.844304
Mcl-1	Q07820	-0.041 (0.062)	0.51	0.765	-0.044 (0.064)	0.49	0.865291
MCP-1	P13500	0.0022 (0.039)	0.95	0.978493	-0.015 (0.04 )	0.7	0.920867
MCP-2	P80075	-0.033 (0.038)	0.39	0.676795	-0.018 (0.039)	0.64	0.900971
MCP-3	P80098	0.05 (0.041)	0.22	0.511765	0.038 (0.04 )	0.35	0.774153
MCP-4	Q99616	0.048 (0.033)	0.15	0.407813	0.034 (0.034)	0.31	0.750557
M-CSF R	P07333	0.035 (0.038)	0.36	0.653408	0.055 (0.039)	0.15	0.619462
MDC	O00626	0.018 (0.039)	0.64	0.847059	-0.0096 (0.038)	0.8	0.949955
MDHC	P40925	0.086 (0.046)	0.063	0.279643	0.045 (0.043)	0.3	0.740076
MDM2	Q00987	0.03 (0.045)	0.5	0.763158	0.037 (0.046)	0.43	0.831333
MED-1	Q15648	-0.059 (0.024)	0.013	0.158551	-0.05 (0.024)	0.04	0.482953
MEK1	Q02750	-0.0067 (0.025)	0.79	0.9164	-0.01 (0.026)	0.69	0.916955
MEPE	Q9NQ76	0.022 (0.039)	0.58	0.810385	0.024 (0.04 )	0.56	0.871037
Mesothelin	Q13421	0.036 (0.071)	0.61	0.831818	0.063 (0.073)	0.39	0.807857
Met	P08581	-0.019 (0.026)	0.47	0.744357	-0.018 (0.027)	0.49	0.865291
METAP1	P53582	0.24 (0.11 )	0.023	0.193645	0.17 (0.1 )	0.1	0.552966
MFGM	Q08431	-0.13 (0.072)	0.074	0.298978	-0.088 (0.071)	0.22	0.685203
MFRP	Q9BY79	0.062 (0.044)	0.17	0.444589	0.044 (0.045)	0.33	0.758187
MIA	Q16674	-0.042 (0.027)	0.12	0.365888	-0.051 (0.028)	0.066	0.516102
MIC-1	Q99988	0.065 (0.053)	0.22	0.511765	0.05 (0.047)	0.29	0.737719
MICA	Q29983	-0.075 (0.081)	0.36	0.653408	-0.05 (0.083)	0.54	0.868927
MICB	Q29980	-0.067 (0.062)	0.28	0.580922	-0.052 (0.064)	0.41	0.824422
Midkine	P21741	0.1 (0.056)	0.074	0.298978	0.08 (0.057)	0.16	0.63465
MIF	P14174	0.058 (0.035)	0.094	0.33038	0.039 (0.034)	0.25	0.704644
MIG	Q07325	0.053 (0.059)	0.37	0.661438	0.1 (0.059)	0.087	0.545841
MIP-1a	P10147	0.029 (0.043)	0.5	0.763158	0.022 (0.043)	0.62	0.894033
MIP-3a	P78556	0.1 (0.039)	0.0083	0.128965	0.086 (0.04 )	0.031	0.454551
MIP-3b	Q99731	0.036 (0.053)	0.5	0.763158	0.031 (0.053)	0.56	0.871037
MIP-5	Q16663	0.054 (0.041)	0.2	0.48423	0.035 (0.042)	0.4	0.815625
MIS	P03971	-0.033 (0.021)	0.12	0.365888	-0.013 (0.02 )	0.51	0.867731
MK01	P28482	0.18 (0.088)	0.039	0.229956	0.13 (0.085)	0.12	0.573626
MK08	P45983	0.12 (0.074)	0.11	0.350122	0.079 (0.071)	0.26	0.714316
MK11	Q15759	-0.0049 (0.069)	0.94	0.976672	0.003 (0.071)	0.97	0.985097
MK12	P53778	0.052 (0.04 )	0.19	0.471388	0.038 (0.04 )	0.35	0.774153
MK13	O15264	0.042 (0.045)	0.35	0.645127	0.045 (0.047)	0.33	0.758187
MMEL2	Q495T6	0.059 (0.032)	0.07	0.29373	0.03 (0.032)	0.34	0.767647
MMP-1	P03956	0.11 (0.079)	0.18	0.452601	0.052 (0.079)	0.51	0.867731
MMP-10	P09238	0.047 (0.055)	0.39	0.676795	0.043 (0.056)	0.44	0.833382
MMP-12	P39900	-0.0011 (0.059)	0.98	0.988331	-0.035 (0.052)	0.51	0.867731
MMP-13	P45452	-0.026 (0.051)	0.61	0.831818	-0.039 (0.052)	0.46	0.844304
MMP-14	P50281	-0.0053 (0.074)	0.94	0.976672	-0.018 (0.076)	0.81	0.954878
MMP-16	P51512	0.11 (0.037)	0.0029	0.101138	0.085 (0.038)	0.025	0.423701
MMP-17	Q9ULZ9	0.074 (0.03 )	0.015	0.163125	0.06 (0.031)	0.052	0.491739
MMP-2	P08253	-0.02 (0.025)	0.41	0.690387	-0.018 (0.025)	0.47	0.84834
MMP-3	P08254	-0.17 (0.1 )	0.085	0.319669	-0.19 (0.1 )	0.058	0.511419
MMP-7	P09237	0.066 (0.05 )	0.19	0.471388	0.049 (0.05 )	0.33	0.758187
MMP-8	P22894	0.048 (0.08 )	0.55	0.793094	-0.015 (0.081)	0.86	0.963348
MMP-9	P14780	0.19 (0.058)	0.00082	0.07134	0.15 (0.057)	0.0093	0.395455
Mn SOD	P04179	-0.081 (0.028)	0.0041	0.111469	-0.066 (0.028)	0.019	0.420254
MO2R1	Q8TD46	-0.0017 (0.028)	0.95	0.978493	0.0093 (0.029)	0.74	0.939205
Moesin	P26038	-0.027 (0.063)	0.67	0.860581	-0.027 (0.065)	0.68	0.912025
MOZ	Q92794	0.11 (0.04 )	0.0071	0.12876	0.11 (0.041)	0.01	0.395455
MP2K2	P36507	-0.091 (0.041)	0.028	0.205281	-0.065 (0.041)	0.11	0.567391
MP2K3	P46734	0.1 (0.038)	0.0084	0.128965	0.068 (0.037)	0.066	0.516102
MP2K4	P45985	-0.041 (0.043)	0.34	0.6375	-0.032 (0.044)	0.46	0.844304
MPIF-1	P55773	0.01 (0.039)	0.79	0.9164	0.014 (0.039)	0.72	0.930297
MRC2	Q9UBG0	0.0069 (0.028)	0.8	0.922261	0.0081 (0.028)	0.78	0.943373
MRCKB	Q9Y5S2	0.07 (0.028)	0.013	0.158551	0.059 (0.029)	0.039	0.482953
MSP	P26927	-0.12 (0.082)	0.14	0.39375	-0.15 (0.084)	0.077	0.537353
MSP R	Q04912	0.037 (0.024)	0.13	0.378683	0.043 (0.025)	0.089	0.547854
MUC1	P15941	0.00095 (0.053)	0.99	0.993808	0.0084 (0.055)	0.88	0.967463
Myeloperoxidase	P05164	0.037 (0.041)	0.37	0.661438	0.035 (0.042)	0.4	0.815625
Myoglobin	P02144	-0.061 (0.032)	0.06	0.279	-0.06 (0.029)	0.04	0.482953
Myokinase, human	P00568	0.15 (0.061)	0.013	0.158551	0.091 (0.058)	0.12	0.573626
Myostatin	O14793	0.043 (0.046)	0.34	0.6375	-0.0026 (0.042)	0.95	0.98004
MYPC1	Q00872	0.1 (0.078)	0.2	0.48423	0.036 (0.074)	0.63	0.894614
NACA	Q13765	0.18 (0.062)	0.0043	0.11223	0.15 (0.06 )	0.017	0.419464
NADPH-P450 Oxidoreductase	P16435	0.057 (0.061)	0.36	0.653408	0.034 (0.062)	0.59	0.880765
NAGK	Q9UJ70	0.068 (0.037)	0.067	0.285735	0.066 (0.038)	0.083	0.542174
NANOG	Q9H9S0	0.068 (0.039)	0.084	0.319592	0.05 (0.04 )	0.22	0.685203
NAP-2	P02775	0.19 (0.12 )	0.11	0.350122	0.12 (0.12 )	0.32	0.758187
NCAM-120	P13591	-0.042 (0.027)	0.13	0.378683	-0.035 (0.027)	0.2	0.674419
NCAM-L1	P32004	0.027 (0.03 )	0.37	0.661438	-0.0042 (0.029)	0.89	0.967463
NCC27	O00299	0.22 (0.11 )	0.04	0.229956	0.14 (0.1 )	0.17	0.641185
NCK1	P16333	0.03 (0.055)	0.59	0.818225	0.017 (0.056)	0.76	0.939205
NDP kinase B	P22392	0.15 (0.098)	0.12	0.365888	0.11 (0.096)	0.27	0.726495
Nectin-like protein 1	Q8N126	-0.00032 (0.056)	1	1	0.025 (0.057)	0.66	0.905678
Nectin-like protein 2	Q9BY67	-0.01 (0.047)	0.82	0.932143	0.0046 (0.048)	0.92	0.970574
NEGR1	Q7Z3B1	-0.025 (0.023)	0.27	0.57107	-0.0066 (0.023)	0.77	0.942636
NET1	O95631	-0.071 (0.035)	0.042	0.234231	-0.065 (0.034)	0.055	0.501923
NET4	Q9HB63	0.049 (0.03 )	0.11	0.350122	0.042 (0.03 )	0.16	0.63465
NEUREGULIN-1	Q02297	0.038 (0.037)	0.32	0.617751	0.048 (0.038)	0.21	0.675
Neurotrophin-3	P20783	-0.012 (0.044)	0.79	0.9164	-0.027 (0.045)	0.55	0.871037
Neurotrophin-5	P34130	-0.045 (0.037)	0.23	0.526579	-0.044 (0.038)	0.25	0.704644
NG36	Q96KQ7	-0.0048 (0.039)	0.9	0.961129	0.003 (0.039)	0.94	0.97745
NID2	Q14112	0.065 (0.031)	0.04	0.229956	0.016 (0.029)	0.58	0.880116
Nidogen	P14543	0.034 (0.029)	0.25	0.548319	-0.017 (0.026)	0.51	0.867731
NKG2D	P26718	0.12 (0.057)	0.038	0.229583	0.1 (0.058)	0.08	0.542174
NKp30	O14931	0.056 (0.041)	0.18	0.452601	0.054 (0.042)	0.2	0.674419
NKp44	O95944	0.056 (0.038)	0.14	0.39375	0.06 (0.039)	0.13	0.591115
NKp46	O76036	-0.012 (0.054)	0.83	0.93375	-0.034 (0.055)	0.54	0.868927
NLGNX	Q8N0W4	-0.035 (0.049)	0.47	0.744357	-0.033 (0.051)	0.52	0.868886
NMT1	P30419	0.14 (0.077)	0.068	0.287184	0.11 (0.074)	0.15	0.619462
Noggin	Q13253	0.074 (0.043)	0.083	0.317639	0.043 (0.042)	0.3	0.740076
Nogo Receptor	Q9BZR6	-0.057 (0.039)	0.15	0.407813	-0.041 (0.039)	0.29	0.737719
NOTC2	Q04721	-0.036 (0.058)	0.54	0.786496	-0.026 (0.06 )	0.67	0.909834
Notch 1	P46531	-0.027 (0.016)	0.1	0.33038	-0.019 (0.017)	0.27	0.726495
Notch-3	Q9UM47	0.0015 (0.03 )	0.96	0.981049	0.0096 (0.031)	0.75	0.939205
NovH	P48745	0.038 (0.039)	0.33	0.628686	0.034 (0.04 )	0.4	0.815625
NPS-PLA2	P14555	0.057 (0.055)	0.3	0.604709	0.067 (0.053)	0.21	0.675
NR1D1	P20393	0.056 (0.038)	0.15	0.407813	0.025 (0.038)	0.51	0.867731
Nr-CAM	Q92823	0.011 (0.039)	0.77	0.9135	0.049 (0.039)	0.21	0.675
NRG4	Q8WWG1	-0.0074 (0.041)	0.86	0.944697	0.0046 (0.042)	0.91	0.969429
NRP1	O14786	0.0015 (0.03 )	0.96	0.981049	0.0093 (0.03 )	0.76	0.939205
NRX1B	P58400	-0.018 (0.041)	0.66	0.854464	0.009 (0.041)	0.83	0.959559
NRX3B	Q9HDB5	-0.023 (0.031)	0.46	0.737469	0.0067 (0.031)	0.83	0.959559
NSE	P09104	-0.0064 (0.065)	0.92	0.964337	0.0032 (0.066)	0.96	0.982588
NSF1C	Q9UNZ2	-0.0061 (0.062)	0.92	0.964337	-0.028 (0.062)	0.65	0.903355
N-terminal pro-BNP	P16860	0.19 (0.1 )	0.065	0.28275	0.26 (0.095)	0.0071	0.395455
Nucleoside diphosphate kinase A	P15531	0.057 (0.048)	0.23	0.526579	0.027 (0.047)	0.57	0.880116
NUDC3	Q8IVD9	-0.058 (0.064)	0.37	0.661438	-0.051 (0.066)	0.44	0.833382
NXPH1	P58417	0.052 (0.049)	0.29	0.595984	0.023 (0.048)	0.64	0.900971
OAS1	P00973	0.0098 (0.069)	0.89	0.958292	0.022 (0.071)	0.75	0.939205
OBCAM	Q14982	0.013 (0.03 )	0.66	0.854464	-0.00087 (0.031)	0.98	0.989095
OCAD1	Q9NX40	0.047 (0.037)	0.2	0.48423	0.022 (0.037)	0.55	0.871037
Olfactomedin-4	Q6UX06	-0.08 (0.078)	0.31	0.604709	-0.064 (0.08 )	0.43	0.831333
OLR1	P78380	0.19 (0.051)	0.00029	0.058725	0.16 (0.051)	0.0016	0.348
OMD	Q99983	-0.079 (0.046)	0.087	0.325315	-0.068 (0.046)	0.14	0.615152
ON	P09486	0.2 (0.089)	0.026	0.198421	0.12 (0.085)	0.16	0.63465
OPG	O00300	-0.021 (0.035)	0.55	0.793094	-0.026 (0.036)	0.47	0.84834
OSM	P13725	-0.072 (0.047)	0.13	0.378683	-0.074 (0.048)	0.13	0.591115
Osteocalcin	P02818	-0.031 (0.06 )	0.61	0.831818	-0.067 (0.061)	0.28	0.733735
Osteopontin	P10451	-0.025 (0.071)	0.73	0.89619	-0.023 (0.072)	0.76	0.939205
OX2G	P41217	-0.067 (0.04 )	0.093	0.33038	-0.056 (0.041)	0.17	0.641185
OX40 Ligand	P23510	-0.032 (0.057)	0.57	0.804162	-0.018 (0.059)	0.76	0.939205
p27Kip1	P46527	0.013 (0.077)	0.86	0.944697	-0.02 (0.078)	0.8	0.949955
p53	P04637	-3e-04 (0.035)	0.99	0.993808	-0.016 (0.035)	0.66	0.905678
PA2G4	Q9UQ80	0.17 (0.077)	0.028	0.205281	0.12 (0.075)	0.11	0.567391
PACAP-27	P18509	-0.043 (0.089)	0.63	0.839785	-0.031 (0.092)	0.74	0.939205
PACAP-38	P18509	0.038 (0.062)	0.54	0.786496	0.018 (0.064)	0.78	0.943373
PAFAH	Q13093	0.011 (0.03 )	0.72	0.888091	4.9e-05 (0.03 )	1	1
PAFAH beta subunit	P68402	0.071 (0.051)	0.16	0.427869	0.052 (0.051)	0.31	0.750557
PAI-1	P05121	0.14 (0.086)	0.11	0.350122	0.1 (0.088)	0.25	0.704644
PAK3	O75914	0.0095 (0.036)	0.79	0.9164	-0.0043 (0.037)	0.91	0.969429
PAK6	Q9NQU5	0.32 (0.14 )	0.023	0.193645	0.21 (0.13 )	0.11	0.567391
PAK7	Q9P286	0.024 (0.032)	0.45	0.73041	0.012 (0.032)	0.72	0.930297
PAPP-A	Q13219	-0.026 (0.054)	0.63	0.839785	0.019 (0.049)	0.7	0.920867
paraoxonase 1	P27169	0.036 (0.035)	0.31	0.604709	0.026 (0.036)	0.47	0.84834
PARC	P55774	-0.041 (0.054)	0.46	0.737469	-0.044 (0.053)	0.41	0.824422
PARK7	Q99497	-0.03 (0.059)	0.62	0.835847	-0.027 (0.06 )	0.65	0.903355
PBEF	P43490	-0.066 (0.049)	0.18	0.452601	-0.055 (0.049)	0.27	0.726495
P-Cadherin	P22223	-0.042 (0.023)	0.067	0.285735	-0.036 (0.023)	0.13	0.591115
PCI	P05154	-0.038 (0.019)	0.051	0.255981	-0.035 (0.019)	0.076	0.533226
PCNA	P12004	0.045 (0.033)	0.17	0.444589	0.04 (0.034)	0.23	0.69159
PCSK7	Q16549	-0.056 (0.049)	0.26	0.560826	-0.031 (0.05 )	0.54	0.868927
PCSK9	Q8NBP7	-0.024 (0.032)	0.46	0.737469	-0.015 (0.033)	0.65	0.903355
PDE11	Q9HCR9	0.1 (0.049)	0.04	0.229956	0.056 (0.046)	0.22	0.685203
PDE1A	P54750	0.13 (0.049)	0.0074	0.12876	0.1 (0.049)	0.04	0.482953
PDE3A	Q14432	0.081 (0.042)	0.055	0.266822	0.056 (0.042)	0.18	0.6612
PDE4D	Q08499	-0.037 (0.052)	0.48	0.751981	-0.041 (0.053)	0.44	0.833382
PDE5A	O76074	0.21 (0.11 )	0.062	0.279	0.13 (0.11 )	0.21	0.675
PDE7A	Q13946	0.015 (0.041)	0.71	0.880751	0.0043 (0.041)	0.92	0.970574
PDE9A	O76083	-0.0031 (0.048)	0.95	0.978493	-0.0036 (0.05 )	0.94	0.97745
PDGF Rb	P09619	-0.13 (0.071)	0.068	0.287184	-0.068 (0.071)	0.34	0.767647
PDGF-AA	P04085	0.18 (0.097)	0.061	0.279	0.12 (0.097)	0.2	0.674419
PDGF-BB	P01127	0.25 (0.12 )	0.041	0.231623	0.15 (0.12 )	0.22	0.685203
PDGF-CC	Q9NRA1	0.07 (0.066)	0.29	0.595984	0.073 (0.067)	0.28	0.733735
PDGFRA	P16234	-0.042 (0.047)	0.37	0.661438	-0.039 (0.048)	0.41	0.824422
PDK1	Q15118	-0.0097 (0.053)	0.85	0.940042	-0.026 (0.053)	0.63	0.894614
PD-L2	Q9BQ51	0.02 (0.035)	0.58	0.810385	0.022 (0.036)	0.55	0.871037
PDPK1	O15530	0.2 (0.1 )	0.058	0.275236	0.14 (0.1 )	0.17	0.641185
PDXK	O00764	-0.015 (0.049)	0.76	0.909074	-0.013 (0.049)	0.79	0.947564
PECAM-1	P16284	0.0014 (0.021)	0.95	0.978493	-0.0056 (0.021)	0.79	0.947564
PEDF	P36955	-0.018 (0.019)	0.33	0.628686	-0.013 (0.018)	0.48	0.85457
Periostin	Q15063	-0.032 (0.032)	0.32	0.617751	-0.03 (0.032)	0.36	0.779104
PERL	P22079	0.054 (0.064)	0.4	0.679688	-0.0096 (0.059)	0.87	0.965434
Peroxiredoxin-1	Q06830	0.2 (0.056)	0.0006	0.06525	0.14 (0.054)	0.0083	0.395455
Peroxiredoxin-5	P30044	0.1 (0.072)	0.15	0.407813	0.054 (0.07 )	0.44	0.833382
Peroxiredoxin-6	P30041	0.14 (0.068)	0.04	0.229956	0.1 (0.067)	0.13	0.591115
Persephin	O60542	0.049 (0.037)	0.18	0.452601	0.024 (0.033)	0.47	0.84834
PESC	O00541	0.041 (0.049)	0.4	0.679688	0.026 (0.05 )	0.6	0.880765
PEX5	P50542	0.09 (0.055)	0.1	0.33038	0.092 (0.056)	0.1	0.552966
PF-4	P02776	0.19 (0.14 )	0.18	0.452601	0.12 (0.14 )	0.39	0.807857
PFD5	Q99471	0.0015 (0.025)	0.95	0.978493	-0.0017 (0.025)	0.95	0.98004
PGCB	Q96GW7	-0.022 (0.036)	0.53	0.779763	-0.0061 (0.036)	0.87	0.965434
PGM1	P36871	0.085 (0.059)	0.15	0.407813	0.049 (0.059)	0.41	0.824422
PGP9.5	P09936	0.039 (0.037)	0.3	0.604709	0.02 (0.037)	0.58	0.880116
PGRP-S	O75594	0.21 (0.084)	0.012	0.15505	0.16 (0.085)	0.06	0.516102
PH	P01298	-0.0053 (0.08 )	0.95	0.978493	0.015 (0.081)	0.85	0.959559
PHI	P06744	0.059 (0.058)	0.31	0.604709	0.047 (0.058)	0.42	0.829198
phosphoglycerate kinase 1	P00558	-0.0015 (0.056)	0.98	0.988331	-0.0029 (0.056)	0.96	0.982588
Phosphoglycerate mutase 1	P18669	-0.21 (0.14 )	0.13	0.378683	-0.2 (0.14 )	0.15	0.619462
PIANP	Q8IYJ0	-0.039 (0.039)	0.33	0.628686	-0.025 (0.038)	0.52	0.868886
PIAS4	Q8N2W9	-0.02 (0.031)	0.53	0.779763	-0.017 (0.032)	0.59	0.880765
PIGR	P01833	0.08 (0.055)	0.15	0.407813	0.035 (0.053)	0.5	0.866534
PIK3CA/PIK3R1	P42336 P27986	0.026 (0.047)	0.59	0.818225	0.029 (0.047)	0.54	0.868927
PIM1	P11309	0.015 (0.04 )	0.7	0.875839	0.0016 (0.041)	0.97	0.985097
PK3CG	P48736	0.054 (0.032)	0.09	0.328073	0.042 (0.032)	0.19	0.6612
PKB a/b/g	P31749 P31751 Q9Y243	0.14 (0.083)	0.1	0.33038	0.084 (0.079)	0.29	0.737719
PKB beta	P31751	0.16 (0.087)	0.061	0.279	0.095 (0.082)	0.25	0.704644
PKC-A	P17252	0.24 (0.15 )	0.096	0.33038	0.17 (0.14 )	0.22	0.685203
PKC-B-II	P05771	0.33 (0.16 )	0.042	0.234231	0.24 (0.16 )	0.13	0.591115
PKC-D	Q05655	0.049 (0.046)	0.28	0.580922	0.013 (0.043)	0.76	0.939205
PKC-G	P05129	-0.038 (0.042)	0.38	0.671951	-0.022 (0.043)	0.61	0.88647
PKC-Z	Q05513	0.1 (0.04 )	0.0094	0.140323	0.088 (0.041)	0.032	0.457423
Plasmin	P00747	0.034 (0.053)	0.52	0.773774	0.051 (0.055)	0.35	0.774153
Plasminogen	P00747	-0.023 (0.037)	0.53	0.779763	-0.0047 (0.037)	0.9	0.967463
PLCG1	P19174	0.06 (0.025)	0.018	0.177955	0.049 (0.025)	0.054	0.501923
PlGF	P49763	0.06 (0.037)	0.11	0.350122	0.065 (0.038)	0.086	0.542174
PLK-1	P53350	0.017 (0.037)	0.65	0.84825	0.0079 (0.038)	0.84	0.959559
PLPP	Q96GD0	0.2 (0.066)	0.0025	0.101138	0.15 (0.062)	0.019	0.420254
PLXB2	O15031	0.041 (0.024)	0.09	0.328073	0.04 (0.025)	0.11	0.567391
PLXC1	O60486	-0.011 (0.03 )	0.7	0.875839	0.0069 (0.03 )	0.82	0.959559
PolyUbiquitin K48	P0CG47	0.082 (0.039)	0.035	0.222805	0.069 (0.038)	0.073	0.527705
PolyUbiquitin K63	P0CG48	0.064 (0.035)	0.068	0.287184	0.051 (0.036)	0.15	0.619462
PPAC	P24666	-0.017 (0.12 )	0.88	0.955408	-0.05 (0.12 )	0.68	0.912025
PPase	Q15181	0.06 (0.054)	0.27	0.57107	0.044 (0.054)	0.42	0.829198
PPIB	P23284	0.034 (0.04 )	0.39	0.676795	0.016 (0.041)	0.69	0.916955
PPID	Q08752	0.41 (0.17 )	0.014	0.161681	0.27 (0.15 )	0.086	0.542174
PPIE	Q9UNP9	0.19 (0.078)	0.018	0.177955	0.14 (0.077)	0.065	0.516102
Prekallikrein	P03952	-0.024 (0.024)	0.32	0.617751	0.0034 (0.024)	0.88	0.967463
PRKACA	P17612	-0.038 (0.088)	0.67	0.860581	-0.052 (0.089)	0.56	0.871037
PRL	P01236	0.012 (0.042)	0.77	0.9135	0.026 (0.042)	0.53	0.868927
Prolactin Receptor	P16471	0.019 (0.048)	0.69	0.87	-0.0069 (0.048)	0.89	0.967463
Properdin	P27918	-0.081 (0.04 )	0.046	0.24534	-0.059 (0.04 )	0.14	0.615152
prostatic binding protein	P30086	0.12 (0.052)	0.019	0.182316	0.079 (0.05 )	0.11	0.567391
Protease nexin I	P07093	0.13 (0.065)	0.042	0.234231	0.1 (0.065)	0.12	0.573626
Protein C	P04070	-0.037 (0.027)	0.17	0.444589	-0.018 (0.027)	0.5	0.866534
Protein disulfide isomerase A3	P30101	0.087 (0.047)	0.069	0.290468	0.053 (0.045)	0.25	0.704644
Protein disulfide-isomerase	P07237	-0.026 (0.025)	0.31	0.604709	-0.023 (0.026)	0.37	0.787684
Protein S	P07225	-0.034 (0.02 )	0.082	0.316598	-0.026 (0.02 )	0.2	0.674419
protein Z inhibitor	Q9UK55	-0.053 (0.041)	0.2	0.48423	-0.041 (0.042)	0.33	0.758187
Proteinase-3	P24158	0.11 (0.045)	0.019	0.182316	0.083 (0.046)	0.07	0.516102
Prothrombin	P00734	-0.078 (0.02 )	8.2e-05	0.041325	-0.073 (0.02 )	0.00024	0.1566
PSA	P07288	0.2 (0.1 )	0.055	0.266822	0.062 (0.066)	0.35	0.774153
PSA1	P25786	0.022 (0.045)	0.62	0.835847	0.027 (0.046)	0.56	0.871037
PSA2	P25787	-0.023 (0.021)	0.28	0.580922	-0.015 (0.021)	0.48	0.85457
PSA6	P60900	0.16 (0.049)	0.0017	0.101138	0.11 (0.046)	0.017	0.419464
PSD7	P51665	0.018 (0.032)	0.57	0.804162	0.015 (0.032)	0.64	0.900971
P-Selectin	P16109	0.076 (0.038)	0.046	0.24534	0.041 (0.038)	0.28	0.733735
PSMA	Q04609	0.024 (0.087)	0.79	0.9164	0.051 (0.089)	0.56	0.871037
PSME1	Q06323	0.089 (0.036)	0.014	0.161681	0.069 (0.035)	0.049	0.48694
PSME3	P61289	0.062 (0.051)	0.23	0.526579	0.068 (0.052)	0.19	0.6612
PSP	P05451	0.15 (0.047)	0.0022	0.101138	0.13 (0.047)	0.0057	0.395455
pTEN	P60484	-0.036 (0.054)	0.5	0.763158	-0.048 (0.055)	0.38	0.799839
PTH	P01270	-0.052 (0.058)	0.37	0.661438	-0.058 (0.059)	0.33	0.758187
PTHrP	P12272	-0.068 (0.041)	0.096	0.33038	-0.066 (0.041)	0.11	0.567391
PTK6	Q13882	0.062 (0.041)	0.13	0.378683	0.041 (0.042)	0.33	0.758187
PTN	P21246	-0.011 (0.028)	0.7	0.875839	0.014 (0.024)	0.56	0.871037
PTP-1B	P18031	0.049 (0.042)	0.24	0.540933	0.029 (0.041)	0.48	0.85457
PTP-1C	P29350	0.039 (0.085)	0.65	0.84825	0.0049 (0.085)	0.95	0.98004
PUR8	P30566	0.051 (0.098)	0.61	0.831818	0.044 (0.099)	0.66	0.905678
PYY	P10082	-0.071 (0.046)	0.12	0.365888	-0.043 (0.046)	0.35	0.774153
QORL1	O95825	-0.006 (0.053)	0.91	0.96392	0.027 (0.054)	0.62	0.894033
Rab GDP dissociation inhibitor beta	P50395	0.13 (0.051)	0.014	0.161681	0.085 (0.049)	0.082	0.542174
RAC1	P63000	0.25 (0.11 )	0.016	0.168387	0.17 (0.099)	0.081	0.542174
RAC3	P60763	0.17 (0.064)	0.01	0.140323	0.11 (0.06 )	0.074	0.527705
RAD51	Q06609	-0.058 (0.034)	0.094	0.33038	-0.052 (0.035)	0.15	0.619462
RAN	P62826	0.34 (0.13 )	0.0073	0.12876	0.2 (0.12 )	0.091	0.552966
RANK	Q9Y6Q6	0.069 (0.029)	0.018	0.177955	0.042 (0.027)	0.12	0.573626
RANTES	P13501	0.17 (0.098)	0.075	0.299312	0.11 (0.097)	0.25	0.704644
RAP	P30533	0.066 (0.05 )	0.18	0.452601	0.06 (0.051)	0.24	0.699107
RASA1	P20936	0.016 (0.039)	0.68	0.868297	0.0054 (0.04 )	0.89	0.967463
Rb	P06400	-0.002 (0.039)	0.96	0.981049	-0.0076 (0.041)	0.85	0.959559
RBM39	Q14498	0.0048 (0.039)	0.9	0.961129	-0.012 (0.04 )	0.76	0.939205
RBP	P02753	-0.051 (0.03 )	0.094	0.33038	-0.035 (0.03 )	0.25	0.704644
REG4	Q9BYZ8	0.065 (0.046)	0.16	0.427869	0.054 (0.047)	0.24	0.699107
RELT	Q969Z4	0.0047 (0.033)	0.89	0.958292	-0.013 (0.031)	0.69	0.916955
Renin	P00797	0.21 (0.075)	0.0059	0.122214	0.2 (0.072)	0.0052	0.395455
resistin	Q9HD89	0.038 (0.037)	0.31	0.604709	0.028 (0.038)	0.47	0.84834
RET	P07949	-0.0044 (0.051)	0.93	0.972476	0.021 (0.05 )	0.68	0.912025
RGMA	Q96B86	-0.01 (0.023)	0.66	0.854464	0.0065 (0.023)	0.78	0.943373
RGMB	Q6NW40	-0.021 (0.023)	0.36	0.653408	-0.0042 (0.022)	0.85	0.959559
RGM-C	Q6ZVN8	-0.018 (0.024)	0.45	0.73041	-0.012 (0.025)	0.61	0.88647
RNase H1	O60930	0.15 (0.064)	0.023	0.193645	0.14 (0.065)	0.03	0.454551
RNF43	Q68DV7	0.023 (0.069)	0.74	0.899162	0.031 (0.071)	0.66	0.905678
ROBO2	Q9HCK4	-0.034 (0.023)	0.13	0.378683	-0.0081 (0.022)	0.71	0.925624
ROBO3	Q96MS0	0.017 (0.035)	0.62	0.835847	0.014 (0.036)	0.71	0.925624
ROR1	Q01973	-0.033 (0.03 )	0.27	0.57107	-0.0072 (0.029)	0.8	0.949955
RPS6KA3	P51812	0.07 (0.06 )	0.24	0.540933	0.046 (0.059)	0.44	0.833382
RS3	P23396	0.14 (0.055)	0.01	0.140323	0.11 (0.055)	0.038	0.482953
RS3A	P61247	0.0065 (0.058)	0.91	0.96392	-0.016 (0.058)	0.78	0.943373
RS7	P62081	0.071 (0.041)	0.08	0.312575	0.049 (0.04 )	0.23	0.69159
RSK-like protein kinase	O75582	0.071 (0.037)	0.057	0.272473	0.042 (0.036)	0.24	0.699107
RSPO2	Q6UXX9	0.023 (0.052)	0.65	0.84825	0.019 (0.053)	0.72	0.930297
RSPO3	Q9BXY4	0.03 (0.034)	0.39	0.676795	0.019 (0.035)	0.58	0.880116
RSPO4	Q2I0M5	0.079 (0.042)	0.062	0.279	0.062 (0.041)	0.13	0.591115
RUXF	P62306	-0.015 (0.022)	0.5	0.763158	-0.012 (0.023)	0.6	0.880765
RXFP1	Q9HBX9	0.022 (0.044)	0.62	0.835847	0.017 (0.046)	0.71	0.925624
S100A12	P80511	0.018 (0.038)	0.64	0.847059	0.0053 (0.039)	0.89	0.967463
S100A4	P26447	-0.011 (0.027)	0.68	0.868297	-0.02 (0.027)	0.47	0.84834
S100A6	P06703	0.2 (0.056)	0.00041	0.058725	0.14 (0.054)	0.012	0.416489
S100A7	P31151	-0.13 (0.064)	0.05	0.252907	-0.11 (0.065)	0.093	0.552966
SAA	P0DJI8	-0.0066 (0.14 )	0.96	0.981049	-0.026 (0.14 )	0.85	0.959559
SAP	P02743	0.0052 (0.026)	0.84	0.936123	-0.029 (0.023)	0.21	0.675
SARP-2	Q8N474	-0.019 (0.052)	0.71	0.880751	-0.012 (0.053)	0.81	0.954878
SBDS	Q9Y3A5	0.18 (0.11 )	0.11	0.350122	0.12 (0.11 )	0.26	0.714316
sCD163	Q86VB7	-0.0047 (0.04 )	0.91	0.96392	0.03 (0.04 )	0.45	0.844304
sCD4	P01730	-0.015 (0.035)	0.66	0.854464	-0.0086 (0.036)	0.81	0.954878
SCF sR	P10721	-0.02 (0.04 )	0.62	0.835847	-0.042 (0.039)	0.28	0.733735
SCGF-alpha	Q9Y240	0.017 (0.037)	0.65	0.84825	-0.021 (0.037)	0.56	0.871037
SCGF-beta	Q9Y240	-0.0021 (0.033)	0.95	0.978493	-0.034 (0.033)	0.3	0.740076
SDF-1	P48061	-0.0085 (0.026)	0.74	0.899162	-0.026 (0.026)	0.32	0.758187
SE6L2	Q6UXD5	0.093 (0.065)	0.15	0.407813	0.081 (0.065)	0.21	0.675
Secretin	P09683	0.042 (0.038)	0.28	0.580922	0.038 (0.04 )	0.33	0.758187
SECTM1	Q8WVN6	0.069 (0.03 )	0.023	0.193645	0.075 (0.031)	0.015	0.416489
SEM5A	Q13591	-0.045 (0.036)	0.22	0.511765	-0.027 (0.037)	0.46	0.844304
SEM6B	Q9H3T3	0.065 (0.056)	0.25	0.548319	0.048 (0.057)	0.4	0.815625
Semaphorin 3A	Q14563	0.067 (0.038)	0.077	0.306357	0.05 (0.038)	0.19	0.6612
Semaphorin 3E	O15041	-0.068 (0.051)	0.18	0.452601	-0.06 (0.051)	0.24	0.699107
Semaphorin-6A	Q9H2E6	-0.038 (0.051)	0.45	0.73041	-0.027 (0.052)	0.6	0.880765
SEPR	Q12884	-0.013 (0.031)	0.67	0.860581	-0.0096 (0.031)	0.76	0.939205
sE-Selectin	P16581	0.087 (0.047)	0.064	0.280268	0.069 (0.047)	0.15	0.619462
SET	Q01105	0.011 (0.035)	0.76	0.909074	0.0097 (0.036)	0.79	0.947564
sFRP-3	Q92765	-0.014 (0.029)	0.62	0.835847	0.013 (0.028)	0.65	0.903355
SGTA	O43765	0.14 (0.072)	0.05	0.252907	0.092 (0.069)	0.19	0.6612
SH21A	O60880	0.13 (0.052)	0.014	0.161681	0.091 (0.053)	0.086	0.542174
SHBG	P04278	0.057 (0.068)	0.4	0.679688	0.037 (0.068)	0.59	0.880765
SHC1	P29353	0.11 (0.061)	0.062	0.279	0.074 (0.059)	0.21	0.675
SHP-2	Q06124	0.059 (0.05 )	0.24	0.540933	0.049 (0.05 )	0.33	0.758187
SHPS1	P78324	0.028 (0.1 )	0.78	0.9164	-0.024 (0.1 )	0.81	0.954878
Sialoadhesin	Q9BZZ2	0.0026 (0.045)	0.95	0.978493	-0.004 (0.046)	0.93	0.974037
sICAM-1	P05362	0.019 (0.06 )	0.76	0.909074	0.0069 (0.06 )	0.91	0.969429
sICAM-2	P13598	0.049 (0.024)	0.041	0.231623	0.043 (0.024)	0.074	0.527705
sICAM-3	P32942	0.026 (0.047)	0.57	0.804162	0.022 (0.048)	0.64	0.900971
sICAM-5	Q9UMF0	0.07 (0.039)	0.072	0.296404	0.063 (0.036)	0.084	0.542174
SIG14	Q08ET2	-0.15 (0.11 )	0.19	0.471388	-0.081 (0.11 )	0.47	0.84834
Siglec-3	P20138	0.045 (0.057)	0.43	0.713024	0.024 (0.058)	0.68	0.912025
Siglec-6	O43699	0.042 (0.041)	0.3	0.604709	0.042 (0.042)	0.32	0.758187
Siglec-7	Q9Y286	0.012 (0.032)	0.71	0.880751	0.017 (0.032)	0.59	0.880765
Siglec-9	Q9Y336	-0.46 (0.26 )	0.073	0.297703	-0.52 (0.26 )	0.046	0.482953
SIRT2	Q8IXJ6	0.096 (0.058)	0.098	0.33038	0.066 (0.058)	0.26	0.714316
SKP1	P63208	0.18 (0.045)	9.5e-05	0.041325	0.14 (0.044)	0.0013	0.348
SLAF5	Q9UIB8	0.038 (0.04 )	0.35	0.645127	0.04 (0.041)	0.33	0.758187
SLAF6	Q96DU3	-0.0071 (0.038)	0.85	0.940042	0.00015 (0.038)	1	1
SLAF7	Q9NQ25	0.12 (0.068)	0.09	0.328073	0.074 (0.068)	0.27	0.726495
sLeptin R	P48357	0.041 (0.062)	0.51	0.765	0.059 (0.063)	0.35	0.774153
SLIK1	Q96PX8	0.043 (0.048)	0.38	0.671951	0.029 (0.049)	0.56	0.871037
SLIK5	O94991	-0.1 (0.051)	0.046	0.24534	-0.047 (0.05 )	0.35	0.774153
SLPI	P03973	0.011 (0.024)	0.65	0.84825	-0.012 (0.023)	0.61	0.88647
sLRP1	Q07954	-0.051 (0.046)	0.27	0.57107	-0.041 (0.047)	0.38	0.799839
sL-Selectin	P14151	-0.024 (0.024)	0.33	0.628686	-0.013 (0.024)	0.6	0.880765
SMAC	Q9NR28	0.041 (0.025)	0.11	0.350122	0.028 (0.026)	0.27	0.726495
SMAD2	Q15796	0.26 (0.1 )	0.013	0.158551	0.18 (0.098)	0.074	0.527705
SMAD3	P84022	0.16 (0.062)	0.012	0.15505	0.096 (0.059)	0.1	0.552966
SMOC1	Q9H4F8	-0.024 (0.019)	0.2	0.48423	-0.02 (0.018)	0.27	0.726495
SNAA	P54920	0.2 (0.082)	0.014	0.161681	0.14 (0.079)	0.086	0.542174
SNP25	P60880	-0.027 (0.039)	0.5	0.763158	-0.029 (0.04 )	0.47	0.84834
SOD	P00441	0.092 (0.036)	0.01	0.140323	0.063 (0.034)	0.061	0.516102
SOD3	P08294	-0.072 (0.046)	0.11	0.350122	-0.074 (0.047)	0.12	0.573626
Soggy-1	Q9UK85	0.024 (0.04 )	0.56	0.797817	0.014 (0.041)	0.74	0.939205
Somatostatin-28	P61278	0.043 (0.029)	0.14	0.39375	0.05 (0.029)	0.089	0.547854
Sonic Hedgehog	Q15465	0.044 (0.06 )	0.46	0.737469	0.044 (0.061)	0.47	0.84834
SORC2	Q96PQ0	0.039 (0.12 )	0.75	0.905412	0.075 (0.13 )	0.56	0.871037
Sorting nexin 4	O95219	0.2 (0.11 )	0.063	0.279643	0.13 (0.1 )	0.2	0.674419
SOST	Q9BQB4	-0.018 (0.056)	0.75	0.905412	0.0038 (0.051)	0.94	0.97745
SPARCL1	Q14515	-0.028 (0.034)	0.4	0.679688	-0.019 (0.034)	0.58	0.880116
SP-D	P35247	0.24 (0.082)	0.0042	0.111857	0.18 (0.082)	0.027	0.440437
Sphingosine kinase 1	Q9NYA1	0.24 (0.12 )	0.053	0.261	0.16 (0.12 )	0.17	0.641185
SPHK2	Q9NRA0	0.014 (0.03 )	0.66	0.854464	0.0037 (0.031)	0.9	0.967463
SPINT2	O43291	0.081 (0.037)	0.03	0.205355	0.063 (0.037)	0.09	0.551408
Spondin-1	Q9HCB6	-0.017 (0.026)	0.53	0.779763	-0.016 (0.027)	0.55	0.871037
SPTA2	Q13813	0.15 (0.033)	7.7e-06	0.0100485	0.14 (0.033)	4.2e-05	0.05481
sRAGE	Q15109	-0.15 (0.071)	0.031	0.205355	-0.065 (0.066)	0.33	0.758187
sRANKL	O14788	0.076 (0.05 )	0.13	0.378683	0.082 (0.051)	0.11	0.567391
SRCN1	P12931	0.33 (0.16 )	0.04	0.229956	0.21 (0.15 )	0.18	0.6612
SREC-I	Q14162	0.062 (0.03 )	0.038	0.229583	0.056 (0.03 )	0.062	0.516102
SREC-II	Q96GP6	0.031 (0.047)	0.51	0.765	0.012 (0.047)	0.8	0.949955
SSRP1	Q08945	-0.027 (0.035)	0.44	0.723174	-0.028 (0.036)	0.42	0.829198
ST4S6	Q7LFX5	-0.033 (0.023)	0.16	0.427869	-0.019 (0.024)	0.41	0.824422
STAB2	Q8WWQ8	0.041 (0.03 )	0.18	0.452601	0.033 (0.031)	0.29	0.737719
Stanniocalcin-1	P52823	2.4e-05 (0.032)	1	1	-0.0019 (0.031)	0.95	0.98004
STAT1	P42224	0.24 (0.093)	0.012	0.15505	0.17 (0.09 )	0.067	0.516102
STAT3	P40763	0.19 (0.088)	0.034	0.2175	0.14 (0.086)	0.11	0.567391
STAT6	P42226	0.061 (0.041)	0.14	0.39375	0.051 (0.041)	0.21	0.675
sTie-1	P35590	0.0026 (0.026)	0.92	0.964337	0.011 (0.027)	0.69	0.916955
sTie-2	Q02763	0.035 (0.03 )	0.25	0.548319	0.035 (0.031)	0.26	0.714316
STK16	O75716	0.0077 (0.053)	0.89	0.958292	-0.014 (0.054)	0.79	0.947564
STRATIFIN	P31947	0.013 (0.035)	0.7	0.875839	0.0073 (0.037)	0.84	0.959559
Stress-induced-phosphoprotein 1	P31948	0.19 (0.071)	0.0084	0.128965	0.14 (0.068)	0.047	0.482953
STX1a	Q16623	0.056 (0.041)	0.18	0.452601	0.055 (0.042)	0.19	0.6612
SUMO3	P55854	0.14 (0.069)	0.047	0.24534	0.1 (0.067)	0.13	0.591115
suPAR	Q03405	0.032 (0.038)	0.39	0.676795	0.052 (0.036)	0.15	0.619462
Survivin	O15392	0.059 (0.022)	0.007	0.12876	0.049 (0.022)	0.025	0.423701
TACI	O14836	0.041 (0.024)	0.091	0.329875	0.021 (0.025)	0.4	0.815625
TAFI	Q96IY4	-0.032 (0.019)	0.093	0.33038	-0.026 (0.019)	0.17	0.641185
TAJ	Q9NS68	-0.031 (0.038)	0.41	0.690387	-0.02 (0.038)	0.6	0.880765
TAK1-TAB1	O43318 Q15750	0.067 (0.046)	0.15	0.407813	0.041 (0.045)	0.36	0.779104
TARC	Q92583	0.16 (0.072)	0.031	0.205355	0.063 (0.069)	0.36	0.779104
tau	P10636	0.096 (0.055)	0.084	0.319592	0.11 (0.056)	0.055	0.501923
TBK1	Q9UHD2	-0.0097 (0.033)	0.77	0.9135	-0.018 (0.034)	0.59	0.880765
TBP	P20226	-0.0076 (0.045)	0.87	0.947705	-0.027 (0.046)	0.55	0.871037
TCCR	Q6UWB1	0.032 (0.033)	0.32	0.617751	0.031 (0.034)	0.36	0.779104
TCPTP	P17706	-0.049 (0.029)	0.096	0.33038	-0.045 (0.03 )	0.13	0.591115
TCTP	P13693	0.17 (0.09 )	0.061	0.279	0.11 (0.087)	0.2	0.674419
TEC	P42680	0.22 (0.091)	0.015	0.163125	0.14 (0.087)	0.11	0.567391
TECK	O15444	0.057 (0.067)	0.4	0.679688	0.028 (0.066)	0.67	0.909834
Tenascin	P24821	0.01 (0.039)	0.79	0.9164	0.013 (0.04 )	0.75	0.939205
Testican-1	Q08629	0.035 (0.035)	0.33	0.628686	0.0087 (0.034)	0.8	0.949955
Testican-2	Q92563	0.0017 (0.026)	0.95	0.978493	-0.0052 (0.027)	0.85	0.959559
TF	P13726	-0.0038 (0.038)	0.92	0.964337	-0.0068 (0.039)	0.86	0.963348
TFF1	P04155	0.11 (0.066)	0.085	0.319669	0.058 (0.065)	0.38	0.799839
TFF3	Q07654	0.057 (0.044)	0.2	0.48423	0.068 (0.043)	0.12	0.573626
TFPI	P10646	-0.045 (0.026)	0.088	0.32625	-0.044 (0.027)	0.1	0.552966
TGF-b R II	P37173	0.0068 (0.057)	0.91	0.96392	-0.043 (0.058)	0.46	0.844304
TGF-b R III	Q03167	-0.047 (0.026)	0.067	0.285735	-0.033 (0.026)	0.21	0.675
TGF-b1	P01137	0.057 (0.038)	0.14	0.39375	0.037 (0.039)	0.34	0.767647
TGF-b2	P61812	0.027 (0.051)	0.6	0.829449	0.011 (0.052)	0.83	0.959559
TGF-b3	P10600	0.019 (0.03 )	0.51	0.765	0.016 (0.03 )	0.59	0.880765
TGM3	Q08188	0.095 (0.13 )	0.45	0.73041	0.13 (0.13 )	0.32	0.758187
Thrombin	P00734	-0.0054 (0.091)	0.95	0.978493	-0.011 (0.092)	0.9	0.967463
Thrombopoietin Receptor	P40238	0.0047 (0.025)	0.85	0.940042	-0.0014 (0.025)	0.96	0.982588
Thrombospondin-1	P07996	0.19 (0.11 )	0.078	0.308455	0.12 (0.11 )	0.26	0.714316
Thymidine kinase	P04183	0.011 (0.026)	0.67	0.860581	0.016 (0.027)	0.54	0.868927
Thyroglobulin	P01266	0.017 (0.031)	0.58	0.810385	0.012 (0.032)	0.71	0.925624
Thyroxine-Binding Globulin	P05543	0.019 (0.04 )	0.64	0.847059	0.033 (0.04 )	0.42	0.829198
TIG2	Q99969	-0.021 (0.025)	0.4	0.679688	-0.0069 (0.025)	0.78	0.943373
TIMD3	Q8TDQ0	0.014 (0.037)	0.71	0.880751	0.022 (0.037)	0.55	0.871037
TIMP-1	P01033	0.064 (0.032)	0.05	0.252907	0.043 (0.033)	0.19	0.6612
TIMP-2	P16035	0.011 (0.022)	0.63	0.839785	0.01 (0.023)	0.65	0.903355
TIMP-3	P35625	0.14 (0.077)	0.075	0.299312	0.12 (0.079)	0.12	0.573626
TLR2	O60603	0.04 (0.044)	0.36	0.653408	0.052 (0.044)	0.25	0.704644
TLR4	O00206	0.083 (0.051)	0.1	0.33038	0.095 (0.052)	0.068	0.516102
TLR4:MD-2 complex	O00206 Q9Y6Y9	0.017 (0.028)	0.56	0.797817	0.022 (0.029)	0.44	0.833382
TMA	P07202	0.063 (0.029)	0.031	0.205355	0.05 (0.029)	0.094	0.552966
TNF sR-I	P19438	0.011 (0.03 )	0.72	0.888091	0.03 (0.028)	0.29	0.737719
TNF sR-II	P20333	0.0071 (0.045)	0.88	0.955408	0.023 (0.046)	0.61	0.88647
TNF-a	P01375	0.058 (0.032)	0.071	0.294143	0.041 (0.033)	0.21	0.675
TNF-b	P01374	0.081 (0.041)	0.047	0.24534	0.073 (0.042)	0.08	0.542174
TNFSF15	O95150	0.013 (0.039)	0.74	0.899162	0.021 (0.039)	0.58	0.880116
TNFSF18	Q9UNG2	-0.016 (0.029)	0.58	0.810385	-0.019 (0.03 )	0.52	0.868886
TNR4	P43489	0.056 (0.033)	0.093	0.33038	0.053 (0.034)	0.12	0.573626
Topoisomerase I	P11387	0.12 (0.058)	0.04	0.229956	0.12 (0.059)	0.041	0.482953
tPA	P00750	0.0028 (0.068)	0.97	0.985864	0.0071 (0.07 )	0.92	0.970574
Tpo	P40225	0.012 (0.042)	0.78	0.9164	0.013 (0.043)	0.76	0.939205
TPSB2	P20231	-0.031 (0.076)	0.69	0.87	-0.051 (0.078)	0.51	0.867731
TPSG1	Q9NRR2	0.0085 (0.029)	0.77	0.9135	0.0028 (0.03 )	0.93	0.974037
TRAIL R1	O00220	0.14 (0.056)	0.011	0.149531	0.099 (0.056)	0.079	0.542174
TRAIL R2	O14763	0.092 (0.036)	0.011	0.149531	0.075 (0.037)	0.042	0.482953
TRAIL R4	Q9UBN6	0.0026 (0.026)	0.92	0.964337	-0.0069 (0.027)	0.8	0.949955
transcription factor MLR1, isoform CRA_b	Q8N3X6	0.024 (0.022)	0.28	0.580922	0.018 (0.023)	0.42	0.829198
Transferrin	P02787	-0.037 (0.016)	0.021	0.191643	-0.037 (0.016)	0.021	0.422206
Transgelin-2	P37802	0.025 (0.055)	0.65	0.84825	0.0086 (0.055)	0.88	0.967463
Transketolase	P29401	0.14 (0.068)	0.04	0.229956	0.085 (0.065)	0.19	0.6612
TrATPase	P13686	0.022 (0.032)	0.49	0.760345	-0.0053 (0.033)	0.87	0.965434
Trefoil factor 2	Q03403	0.021 (0.046)	0.64	0.847059	-0.0042 (0.046)	0.93	0.974037
Triosephosphate isomerase	P60174	0.17 (0.074)	0.025	0.198421	0.11 (0.071)	0.13	0.591115
TrkA	P04629	0.043 (0.048)	0.37	0.661438	0.02 (0.049)	0.68	0.912025
TrkB	Q16620	-0.053 (0.032)	0.1	0.33038	-0.021 (0.032)	0.53	0.868927
TrkC	Q16288	-0.082 (0.045)	0.071	0.294143	-0.071 (0.046)	0.12	0.573626
Tropomyosin 1 alpha chain	P09493	0.021 (0.039)	0.59	0.818225	0.023 (0.04 )	0.56	0.871037
Tropomyosin 2	P07951	-0.018 (0.036)	0.62	0.835847	-0.021 (0.036)	0.56	0.871037
Tropomyosin 4	P67936	0.29 (0.18 )	0.12	0.365888	0.2 (0.18 )	0.27	0.726495
Troponin I	P19429	0.0097 (0.048)	0.84	0.936123	0.006 (0.049)	0.9	0.967463
Troponin I, skeletal, fast twitch	P48788	0.13 (0.071)	0.074	0.298978	0.05 (0.064)	0.44	0.833382
Troponin T	P45379	0.13 (0.045)	0.005	0.1125	0.076 (0.041)	0.063	0.516102
TRY3	P35030	-0.017 (0.029)	0.57	0.804162	-0.012 (0.03 )	0.68	0.912025
Trypsin	P07477	-0.085 (0.056)	0.13	0.378683	-0.064 (0.057)	0.27	0.726495
Trypsin 2	P07478	0.068 (0.066)	0.31	0.604709	0.07 (0.068)	0.3	0.740076
TS	P04818	-0.029 (0.057)	0.61	0.831818	-0.053 (0.058)	0.36	0.779104
TSG-6	P98066	0.045 (0.039)	0.25	0.548319	0.015 (0.037)	0.68	0.912025
TSH	P01215 P01222	0.027 (0.073)	0.71	0.880751	0.098 (0.074)	0.18	0.6612
TSLP	Q969D9	0.12 (0.039)	0.0028	0.101138	0.1 (0.039)	0.0098	0.395455
TSLP R	Q9HC73	0.05 (0.03 )	0.089	0.328073	0.034 (0.029)	0.24	0.699107
TSP2	P35442	0.036 (0.049)	0.47	0.744357	0.046 (0.05 )	0.36	0.779104
TSP4	P35443	0.025 (0.032)	0.45	0.73041	0.035 (0.033)	0.29	0.737719
TWEAK	O43508	-0.083 (0.045)	0.066	0.285735	-0.066 (0.046)	0.15	0.619462
TWEAKR	Q9NP84	0.041 (0.06 )	0.5	0.763158	0.052 (0.062)	0.4	0.815625
TXD12	O95881	-0.014 (0.034)	0.67	0.860581	-0.023 (0.035)	0.51	0.867731
TYK2	P29597	-0.027 (0.041)	0.51	0.765	-0.023 (0.042)	0.58	0.880116
UB2G2	P60604	-0.0085 (0.031)	0.78	0.9164	0.0044 (0.031)	0.89	0.967463
UB2L3	P68036	0.14 (0.055)	0.0095	0.140323	0.1 (0.053)	0.06	0.516102
UBC9	P63279	0.15 (0.063)	0.015	0.163125	0.11 (0.061)	0.07	0.516102
UBE2N	P61088	0.18 (0.075)	0.016	0.168387	0.12 (0.071)	0.1	0.552966
Ubiquitin	P62979	0.091 (0.048)	0.057	0.272473	0.075 (0.049)	0.12	0.573626
Ubiquitin+1	P62979	0.18 (0.057)	0.0018	0.101138	0.14 (0.056)	0.014	0.416489
UBP25	Q9UHP3	0.074 (0.05 )	0.14	0.39375	0.071 (0.051)	0.17	0.641185
UCRP	P05161	0.19 (0.066)	0.0039	0.111064	0.13 (0.064)	0.043	0.482953
UFC1	Q9Y3C8	0.079 (0.059)	0.18	0.452601	0.057 (0.058)	0.33	0.758187
UFM1	P61960	0.054 (0.075)	0.47	0.744357	0.033 (0.074)	0.66	0.905678
ULBP-1	Q9BZM6	0.046 (0.073)	0.54	0.786496	0.04 (0.076)	0.6	0.880765
ULBP-2	Q9BZM5	0.002 (0.054)	0.97	0.985864	0.0055 (0.054)	0.92	0.970574
ULBP-3	Q9BZM4	0.13 (0.045)	0.004	0.111064	0.096 (0.045)	0.036	0.474545
UNC5H3	O95185	-0.0038 (0.027)	0.89	0.958292	0.023 (0.026)	0.37	0.787684
UNC5H4	Q6UXZ4	-0.073 (0.04 )	0.072	0.296404	-0.043 (0.04 )	0.28	0.733735
uPA	P00749	-0.028 (0.036)	0.43	0.713024	-0.017 (0.037)	0.64	0.900971
URB	Q76M96	-0.035 (0.026)	0.17	0.444589	-0.019 (0.025)	0.45	0.844304
Vasoactive Intestinal Peptide	P01282	0.077 (0.036)	0.031	0.205355	0.049 (0.035)	0.16	0.63465
VAV	P15498	0.27 (0.11 )	0.018	0.177955	0.17 (0.11 )	0.12	0.573626
VCAM-1	P19320	-0.038 (0.034)	0.27	0.57107	-2e-05 (0.033)	1	1
VEGF	P15692	0.014 (0.024)	0.55	0.793094	-0.00043 (0.024)	0.99	0.994573
VEGF sR2	P35968	0.0092 (0.022)	0.68	0.868297	0.0055 (0.022)	0.8	0.949955
VEGF sR3	P35916	0.017 (0.032)	0.6	0.829449	0.0053 (0.031)	0.87	0.965434
VEGF121	P15692	0.058 (0.053)	0.28	0.580922	0.033 (0.055)	0.55	0.871037
VEGF-C	P49767	0.11 (0.042)	0.0064	0.124657	0.085 (0.042)	0.044	0.482953
VEGF-D	O43915	0.037 (0.035)	0.28	0.580922	0.03 (0.035)	0.39	0.807857
Vitronectin	P04004	-0.012 (0.066)	0.86	0.944697	-0.024 (0.067)	0.72	0.930297
vWF	P04275	-0.02 (0.077)	0.8	0.922261	-0.025 (0.078)	0.75	0.939205
WFKN1	Q96NZ8	-0.032 (0.047)	0.49	0.760345	-0.0046 (0.045)	0.92	0.970574
WFKN2	Q8TEU8	-0.017 (0.039)	0.65	0.84825	-0.0075 (0.04 )	0.85	0.959559
WIF-1	Q9Y5W5	0.013 (0.029)	0.65	0.84825	0.0073 (0.029)	0.8	0.949955
WISP-1	O95388	0.05 (0.044)	0.25	0.548319	0.028 (0.044)	0.52	0.868886
WISP-3	O95389	0.11 (0.054)	0.05	0.252907	0.082 (0.054)	0.13	0.591115
WNK3	Q9BYP7	0.15 (0.055)	0.0073	0.12876	0.11 (0.052)	0.034	0.457423
WNT7A	O00755	0.013 (0.053)	0.81	0.926424	0.012 (0.054)	0.83	0.959559
XEDAR	Q9HAV5	0.039 (0.046)	0.39	0.676795	0.035 (0.047)	0.46	0.844304
XPNPEP1	Q9NQW7	0.012 (0.077)	0.87	0.947705	0.023 (0.077)	0.77	0.942636
XTP3A	Q9H773	-0.064 (0.059)	0.28	0.580922	-0.037 (0.06 )	0.54	0.868927
YES	P07947	0.036 (0.051)	0.48	0.751981	0.01 (0.05 )	0.84	0.959559
YKL-40	P36222	-0.12 (0.12 )	0.31	0.604709	-0.18 (0.12 )	0.13	0.591115
ZAP70	P43403	-0.00099 (0.041)	0.98	0.988331	-0.0088 (0.042)	0.83	0.959559
ZNRF3	Q9ULT6	-0.0093 (0.041)	0.82	0.932143	-0.02 (0.041)	0.62	0.894033
