# Supplementary material
Source: HighWire-hosted journal article supplement (https://bmjopenrespres.bmj.com/content/9/1/e001182)

**Figure S2**

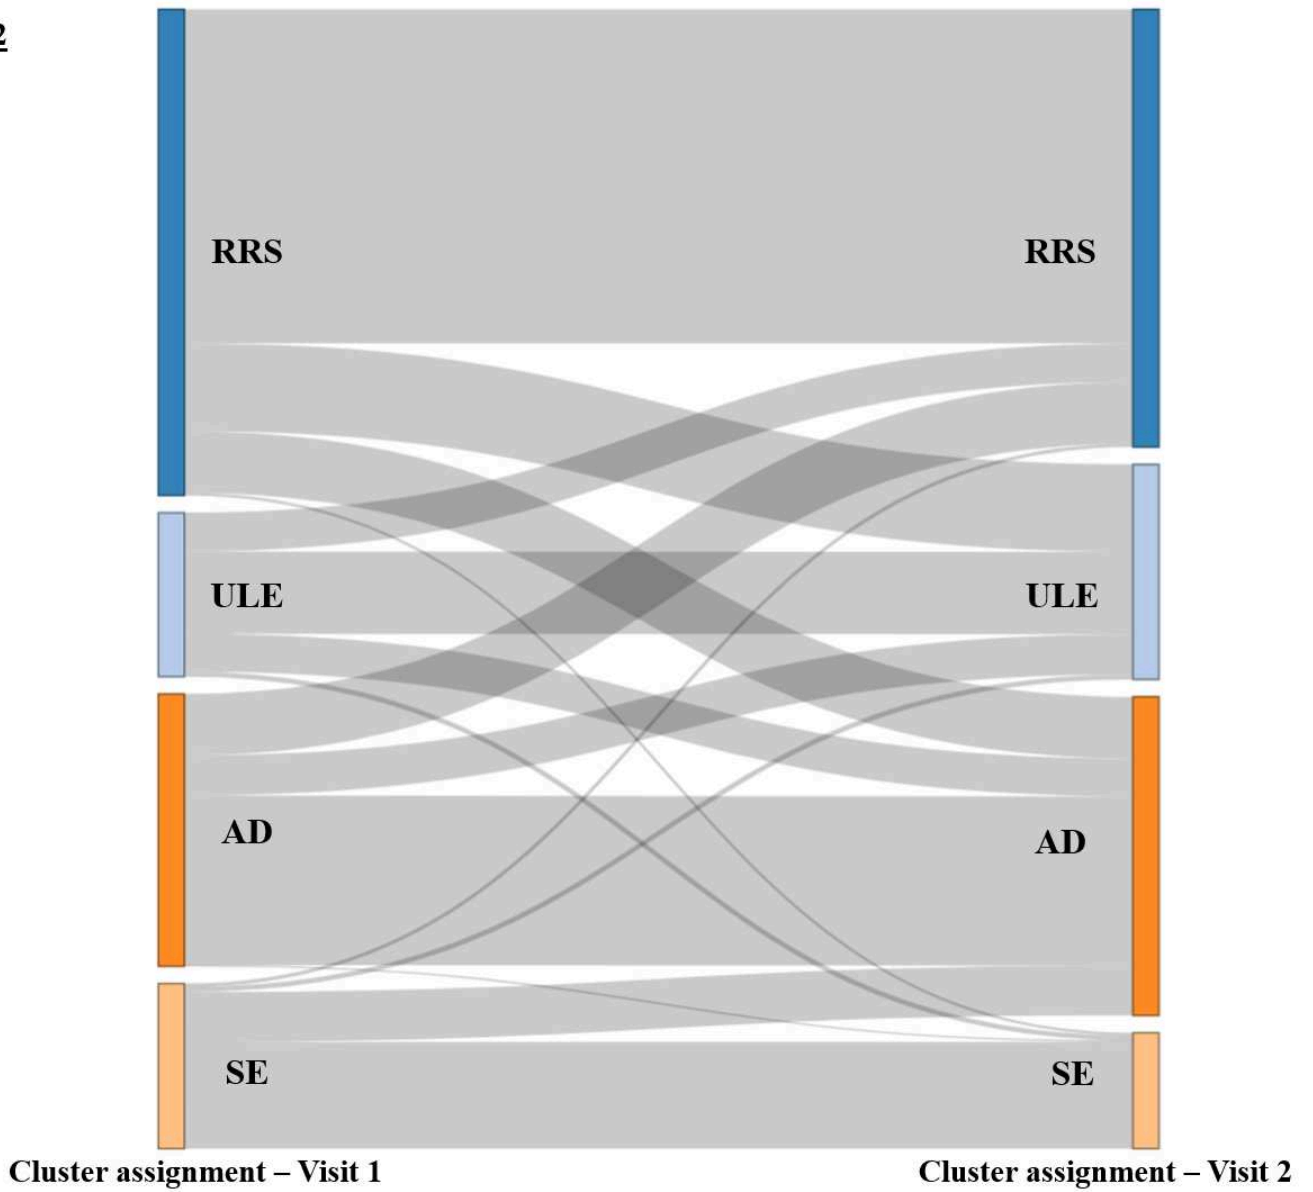

Supplement: inline-supplementary-material-3 [file inline-supplementary-material-3.pdf]

**Figure S3**

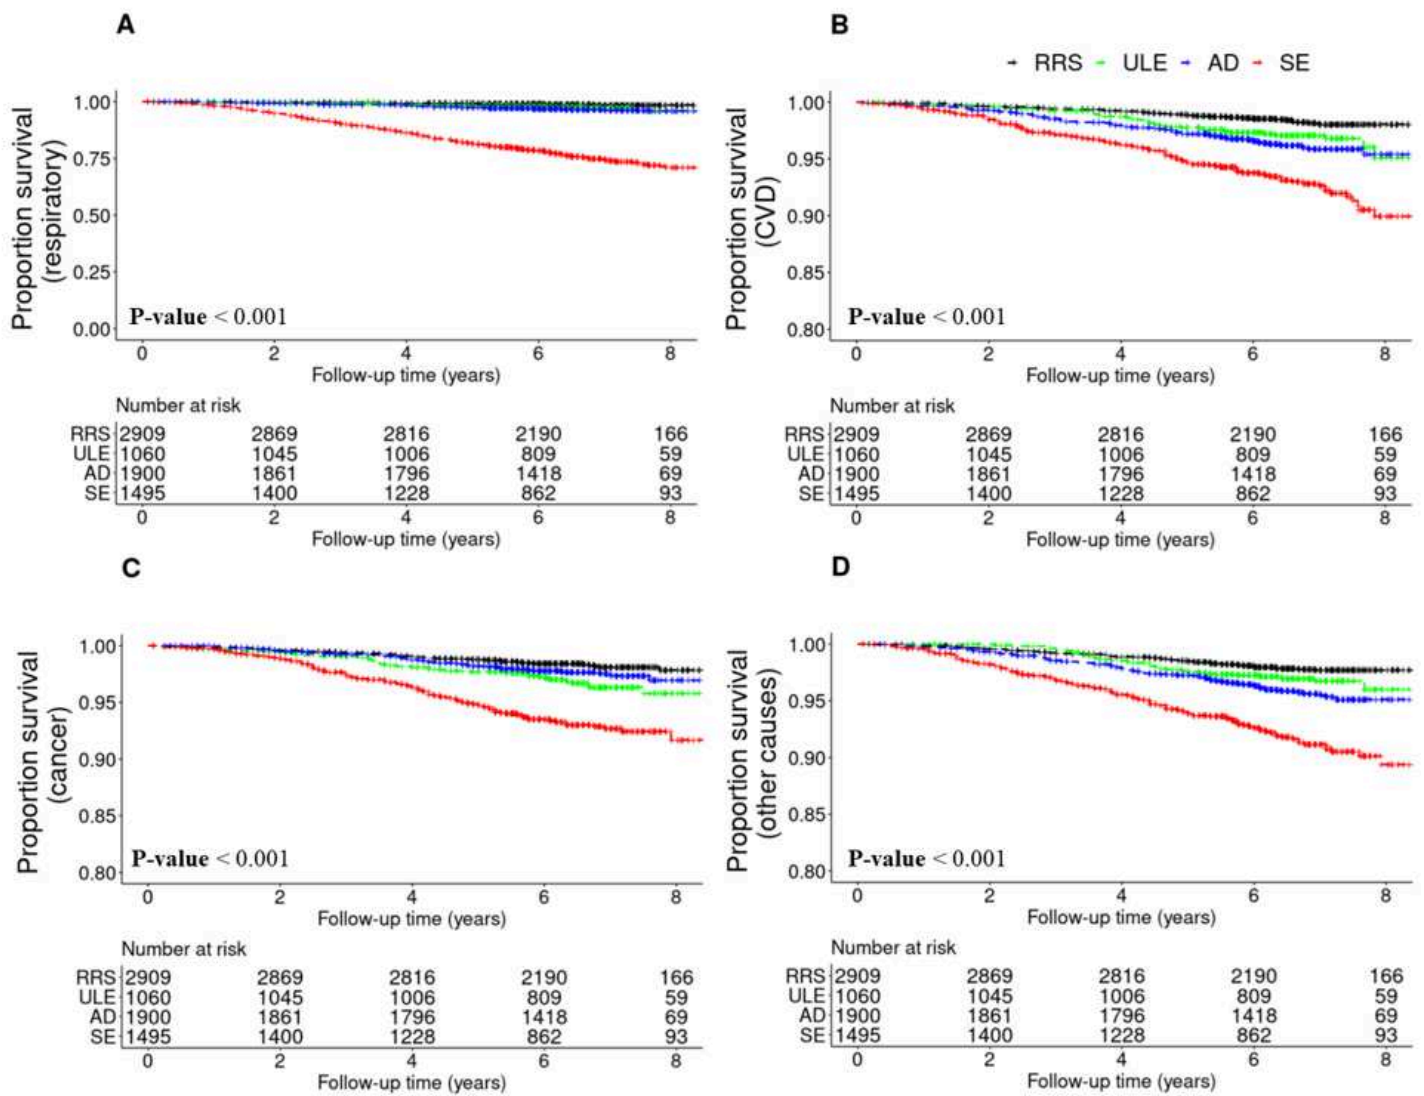

Supplement: inline-supplementary-material-4 [file inline-supplementary-material-4.pdf]
